# Supplementary material for: Iridium Corroles Exhibit Weak Near-Infrared Phosphorescence but Efficiently Sensitize Singlet Oxygen Formation
Source: PubMed Central journal article supplement (PMC7200656; doi:10.1038/s41598-020-64389-3), 2020-05-05
Supplement: 41598_2020_64389_MOESM1_ESM.pdf [file 41598_2020_64389_MOESM1_ESM.pdf]

# Supporting Information

## Iridium Corroles Exhibit Weak Near-Infrared Phosphorescence but Efficiently Sensitize Singlet Oxygen Formation

Ivar K. Thomassen,<sup>a</sup> Laura J. McCormick-McPherson,<sup>b</sup> Sergey M. Borisov<sup>c</sup> and  
Abhik Ghosh<sup>\*,a</sup>

<sup>a</sup>Department of Chemistry, UiT – The Arctic University of Norway, N-9037 Tromsø,  
Norway; Email: abhik.ghosh@uit.no.

<sup>b</sup>Advanced Light Source, Lawrence Berkeley National Laboratory, Berkeley, California  
94720-8229, United States

<sup>c</sup>Institute of Analytical Chemistry and Food Chemistry, Graz University of Technology,  
Stremayrgasse 9, 8010 Graz, Austria; Email: sergey.borisov@tugraz.at

### Table of Contents

|                               |     |
|-------------------------------|-----|
| A. UV-vis spectra             | S2  |
| B. Mass spectra               | S7  |
| C. <sup>1</sup> H NMR spectra | S18 |

## A. UV-vis spectra

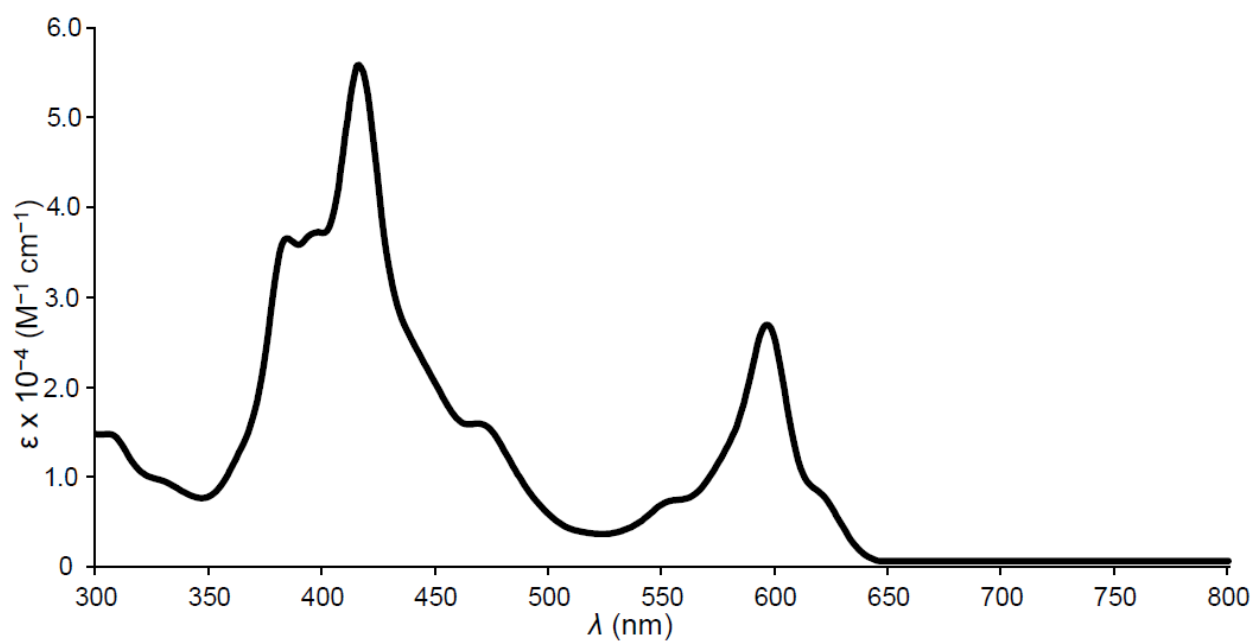

**Figure 1.** UV-vis spectrum of Ir[TPC]tma<sub>2</sub>.

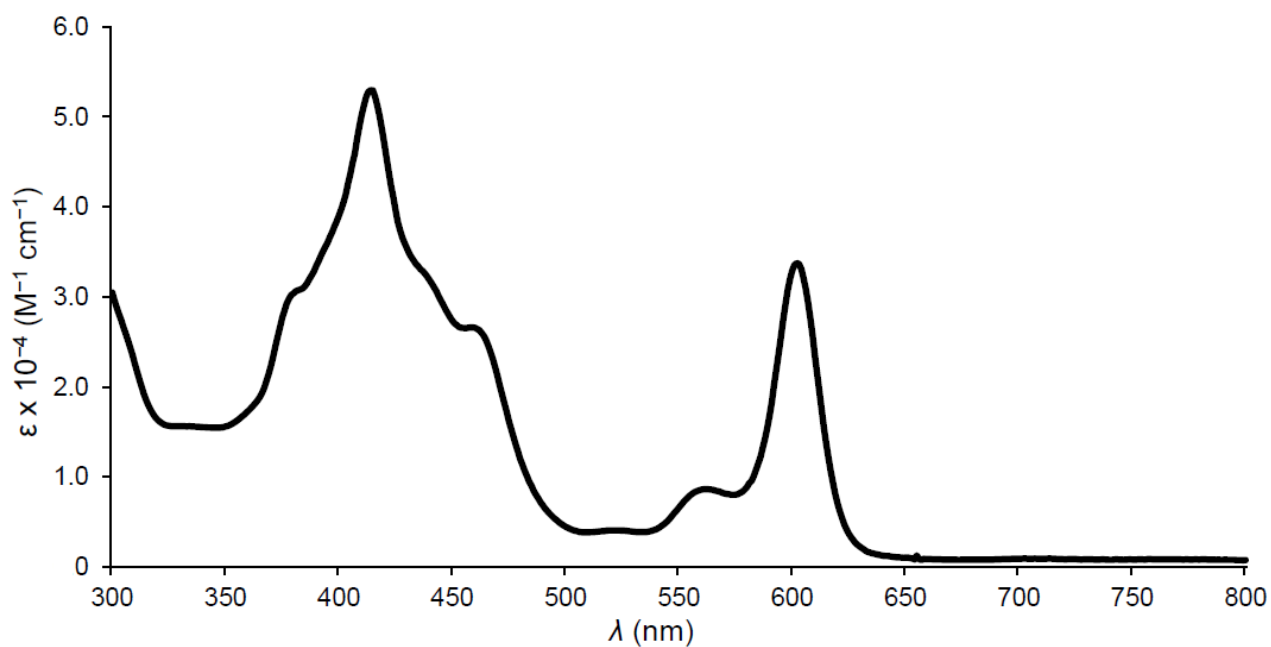

**Figure 2.** UV-vis spectrum of Ir[TPC]py<sub>2</sub>.

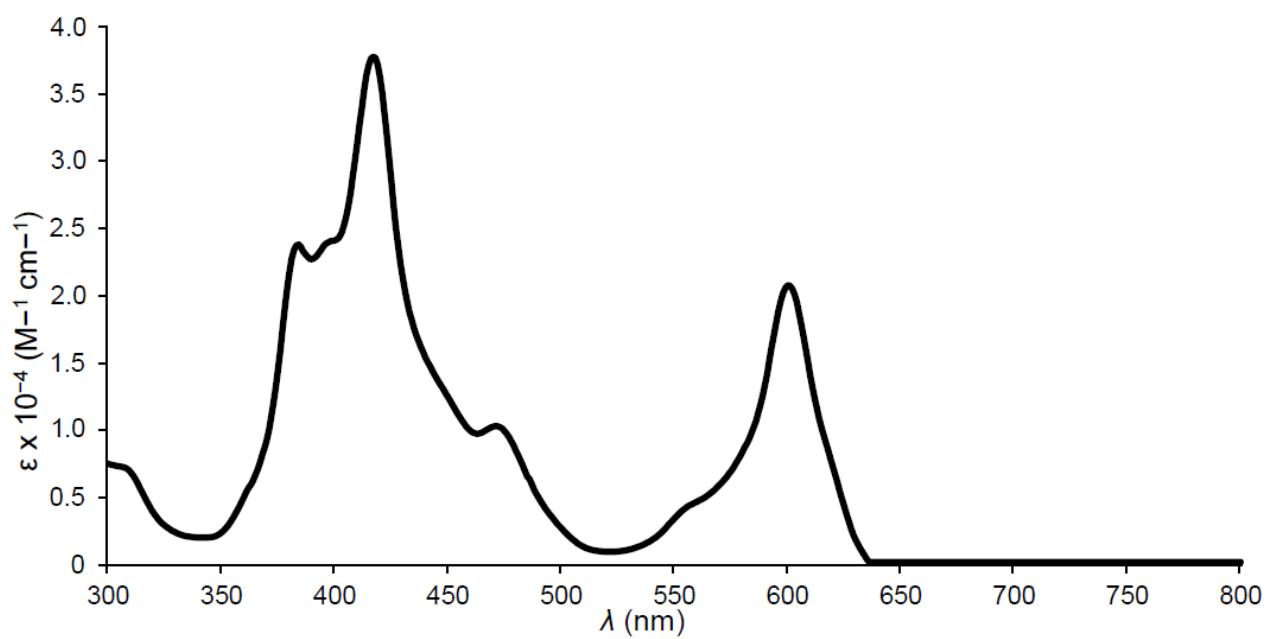

**Figure 3.** UV-vis spectrum of Ir[TpOMePC]tma<sub>2</sub>.

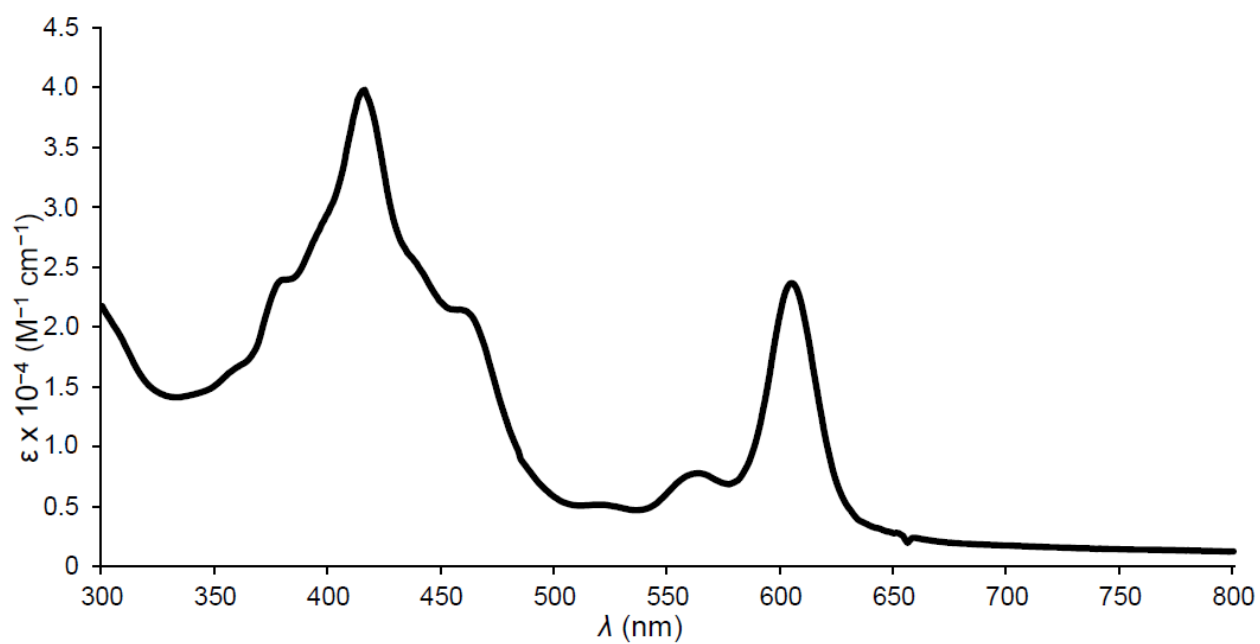

**Figure 4.** UV-vis spectrum of Ir[TpOMePC]py<sub>2</sub>.

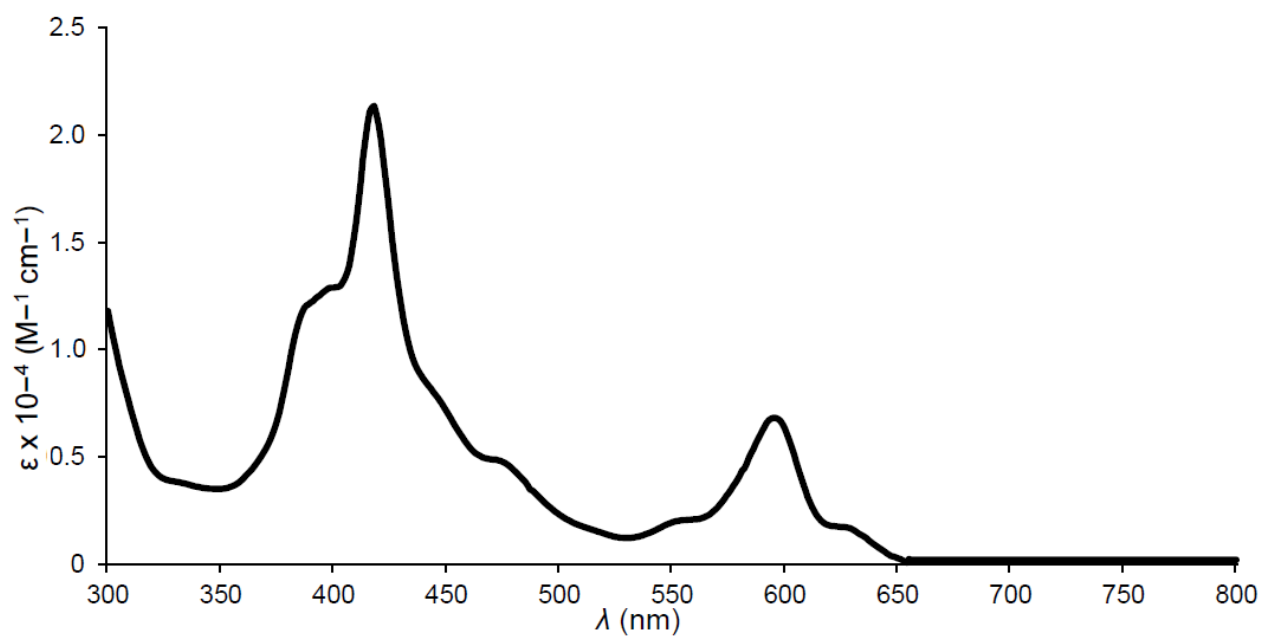

**Figure 5.** UV-vis spectrum of Ir[TpCF<sub>3</sub>PC]tma<sub>2</sub>.

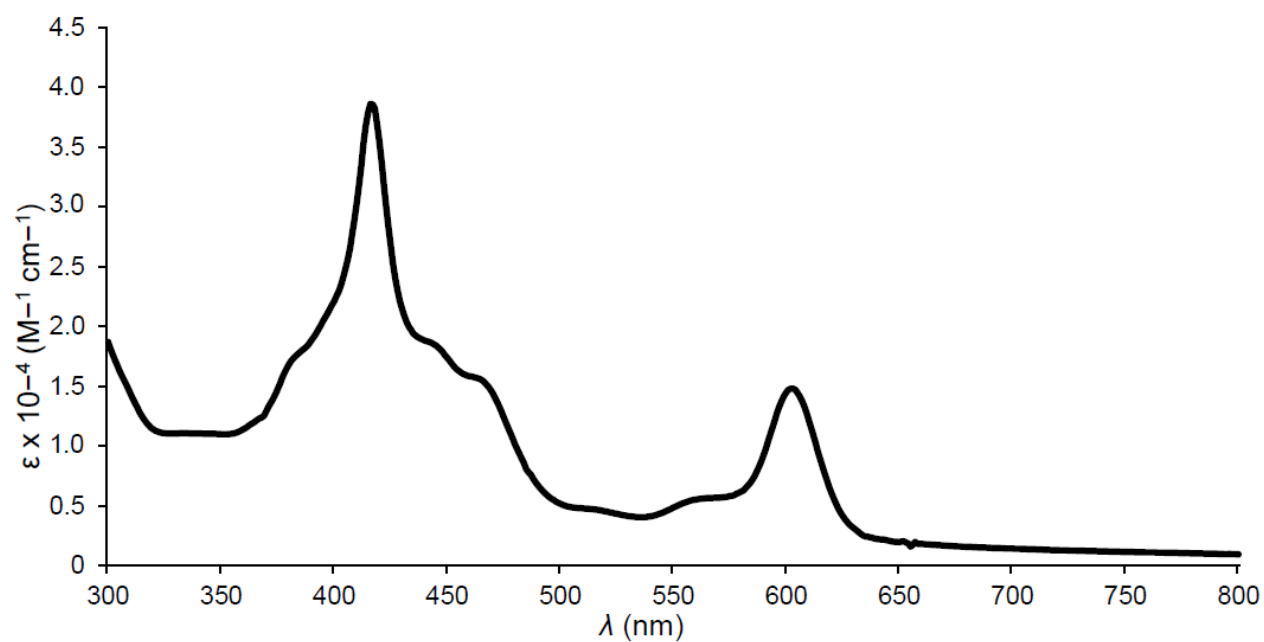

**Figure 6.** UV-vis spectrum of Ir[TpCF<sub>3</sub>PC]py<sub>2</sub>.

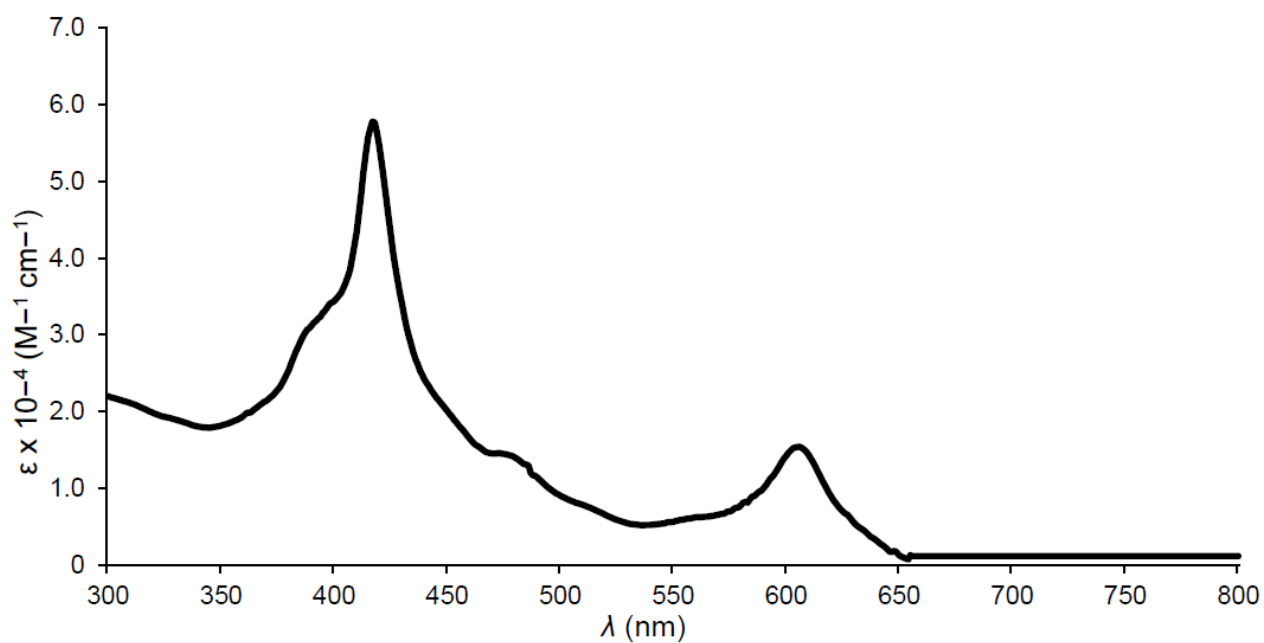

**Figure 7.** UV-vis spectrum of Ir[TpCF<sub>3</sub>PC]dmap<sub>2</sub>.

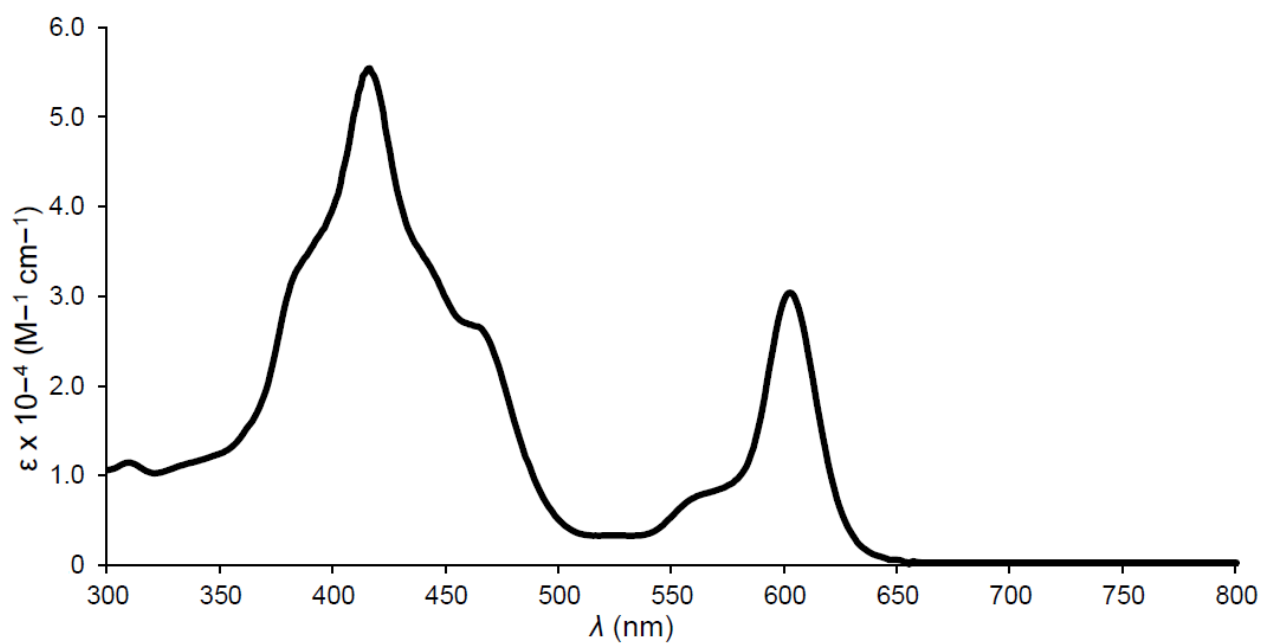

**Figure 8.** UV-vis spectrum of Ir[TpCF<sub>3</sub>PC]4pa<sub>2</sub>.

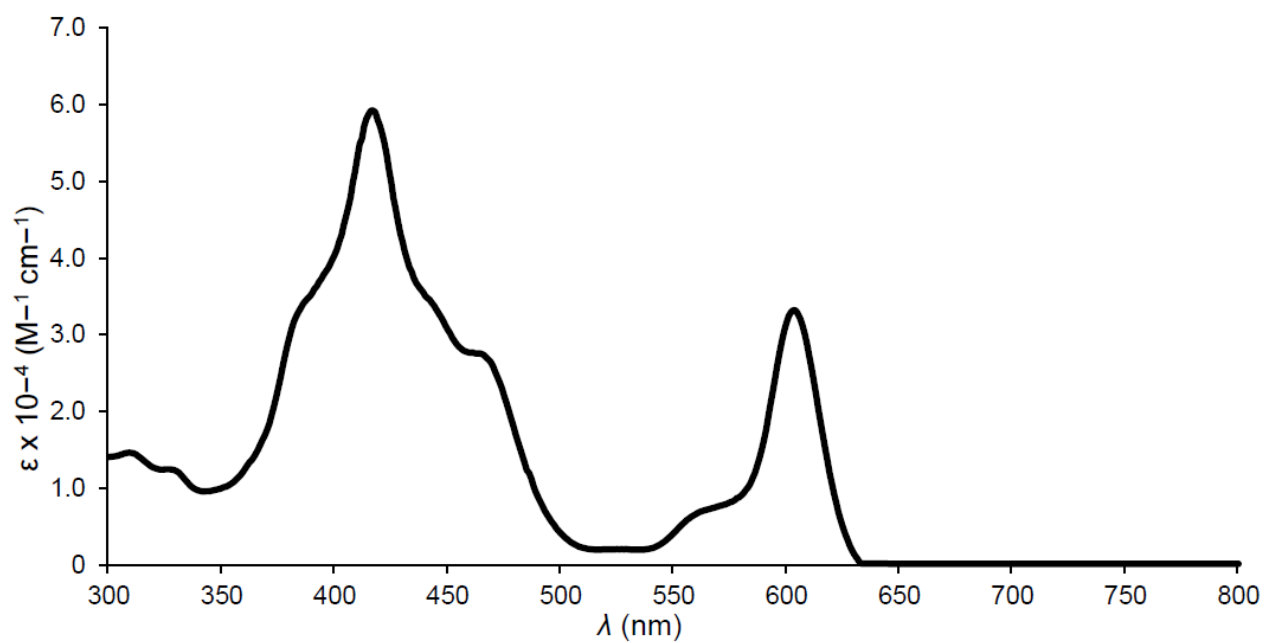

**Figure 9.** UV-vis spectrum of Ir[TpCF<sub>3</sub>PC]isoq<sub>2</sub>.

## B. Mass spectra

AGI\_048\_141\_posb #1-5 RT: 0.01-0.12 AV: 5 NL: 3.58E7  
T: FTMS + p ESI Full ms [600.00-1200.00]

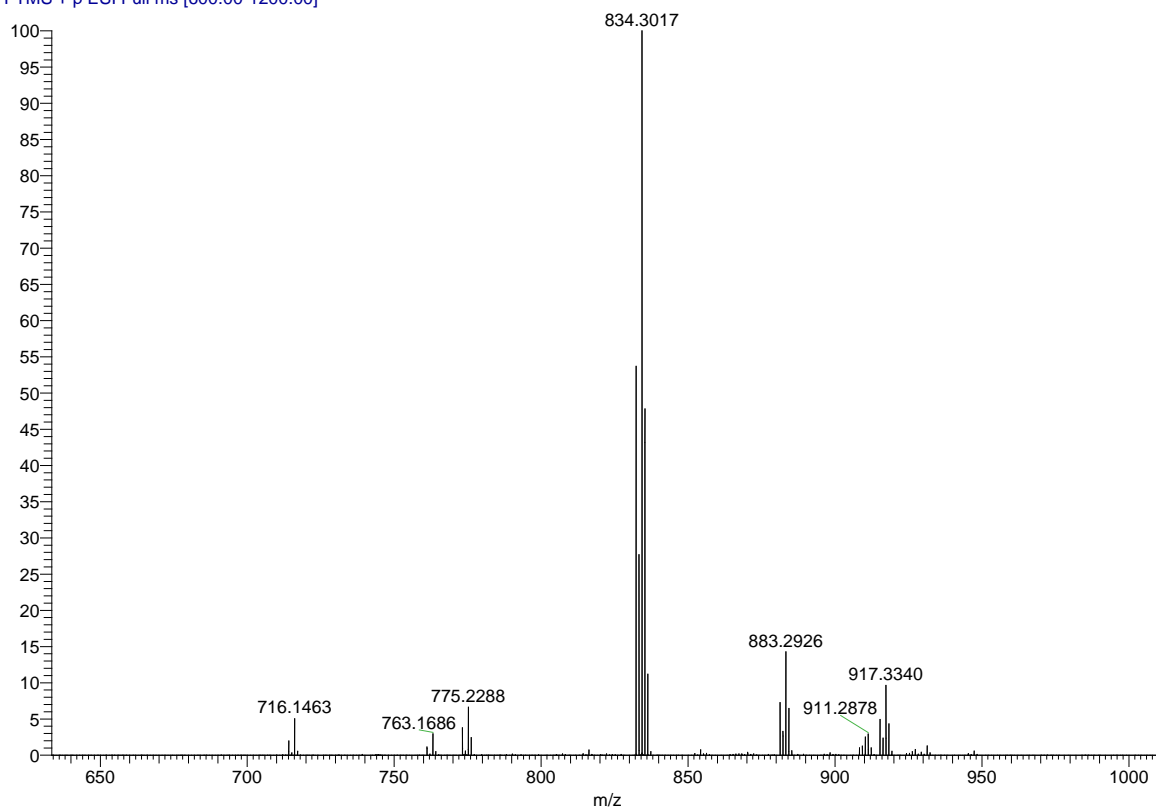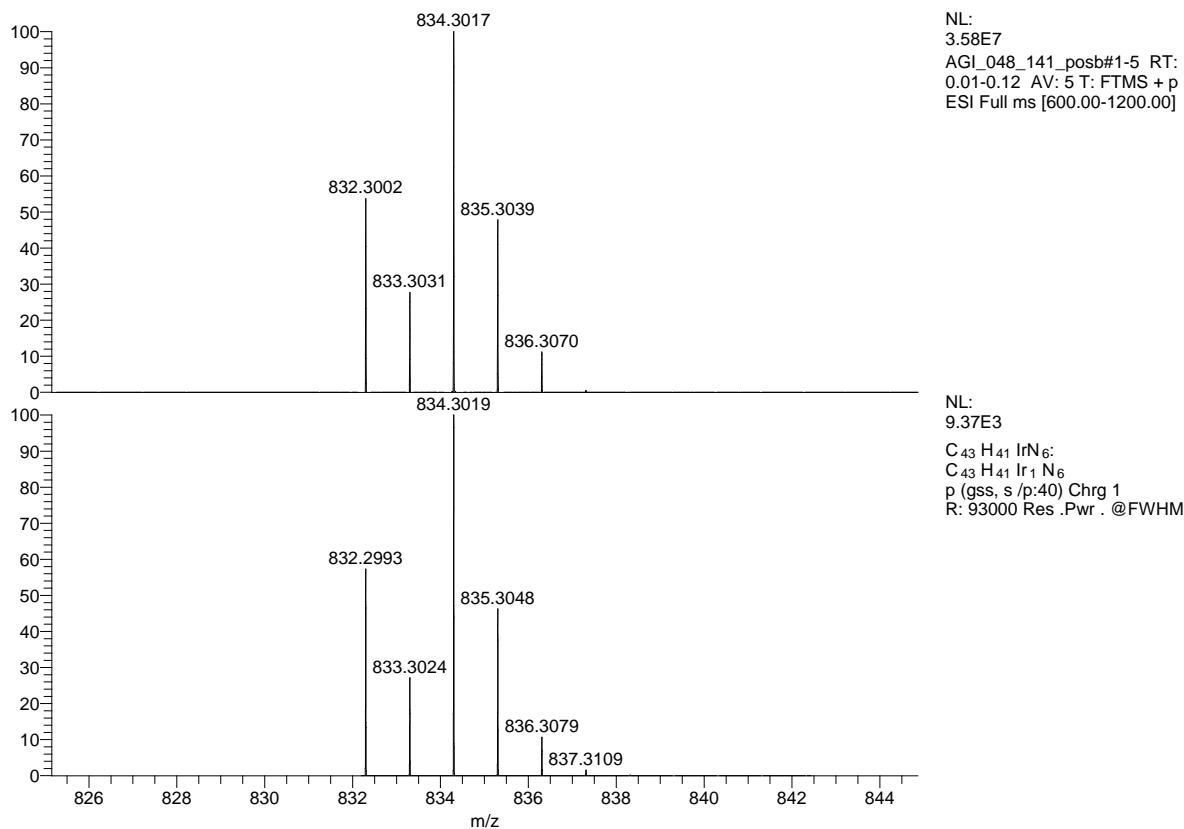

Figure 10. Electrospray ionization mass spectrum of Ir[TPC]tma<sub>2</sub>.

AGI\_066\_168\_pos #1-4 RT: 0.02-0.11 AV: 4 NL: 1.01E7  
T: FTMS + p ESI Full ms [600.00-1500.00]

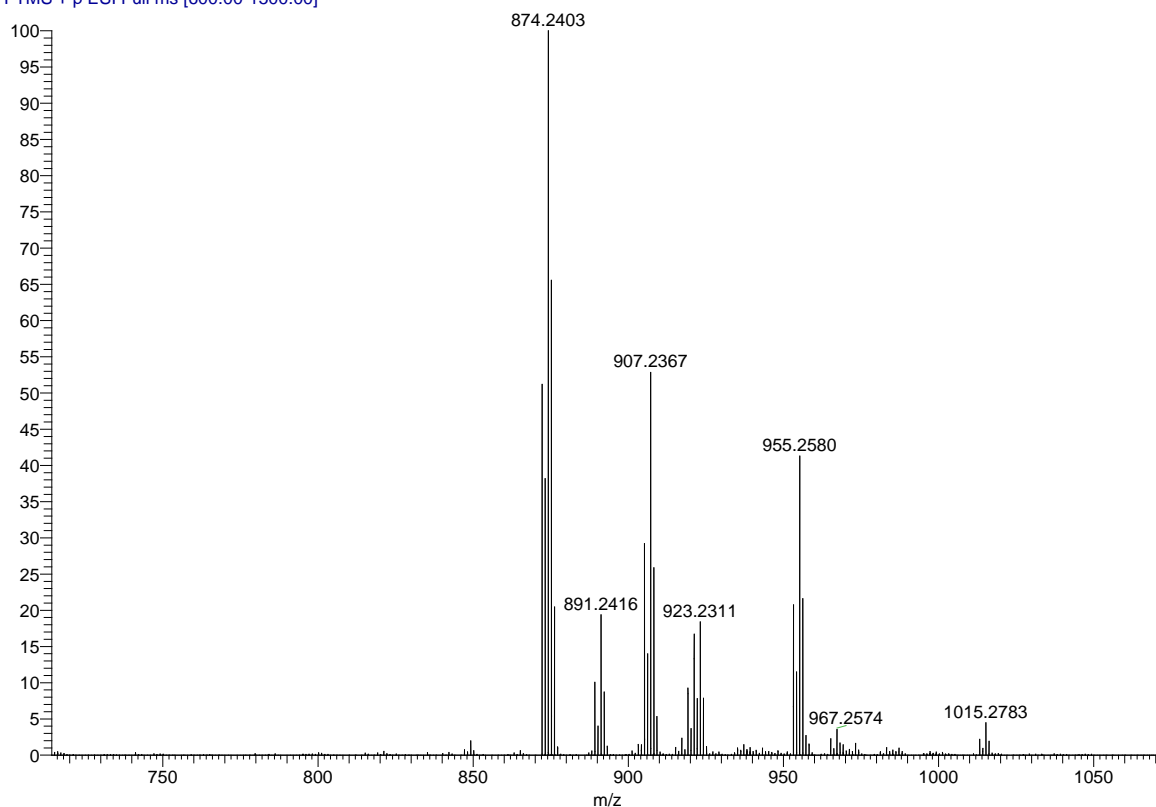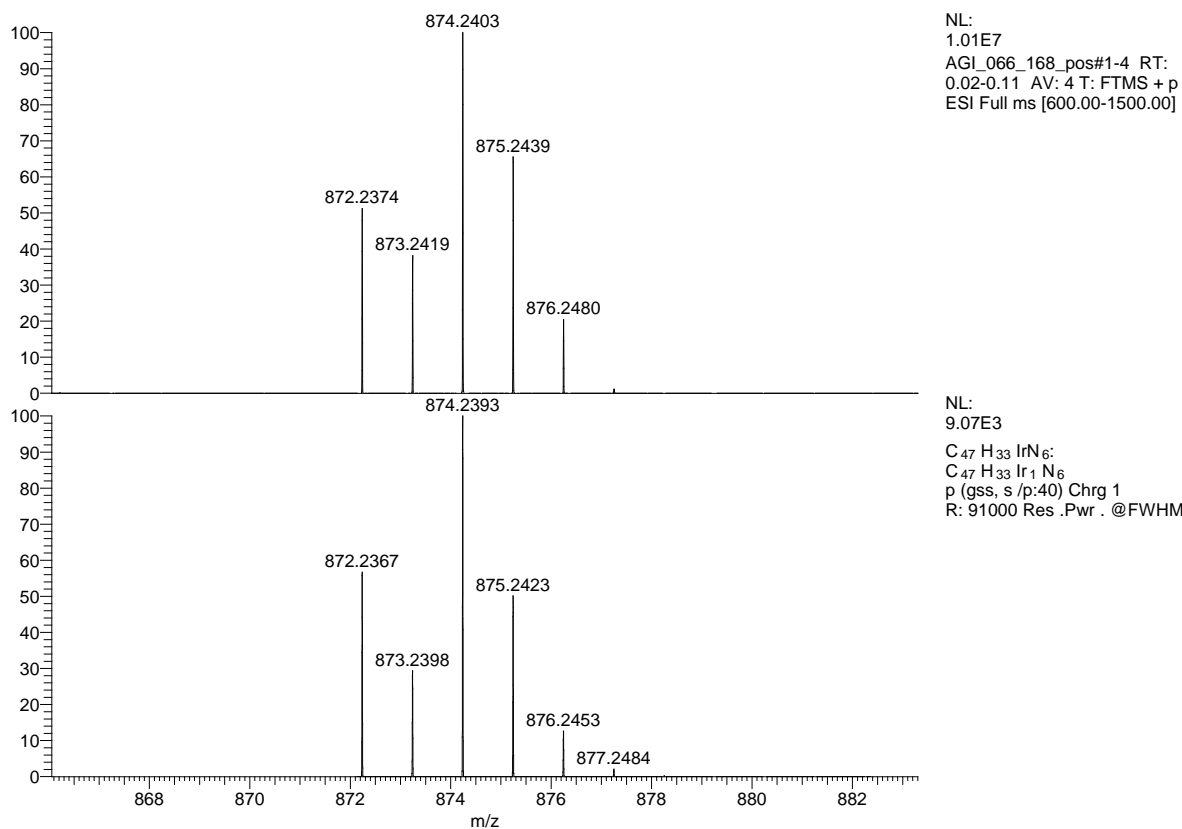

Figure 11. Electrospray ionization mass spectrum of Ir[TPC]py<sub>2</sub>.



AGI\_056\_152\_pos #1-4 RT: 0.02-0.11 AV: 4 NL: 1.59E8  
T: FTMS + p ESI Full ms [600.00-1200.00]

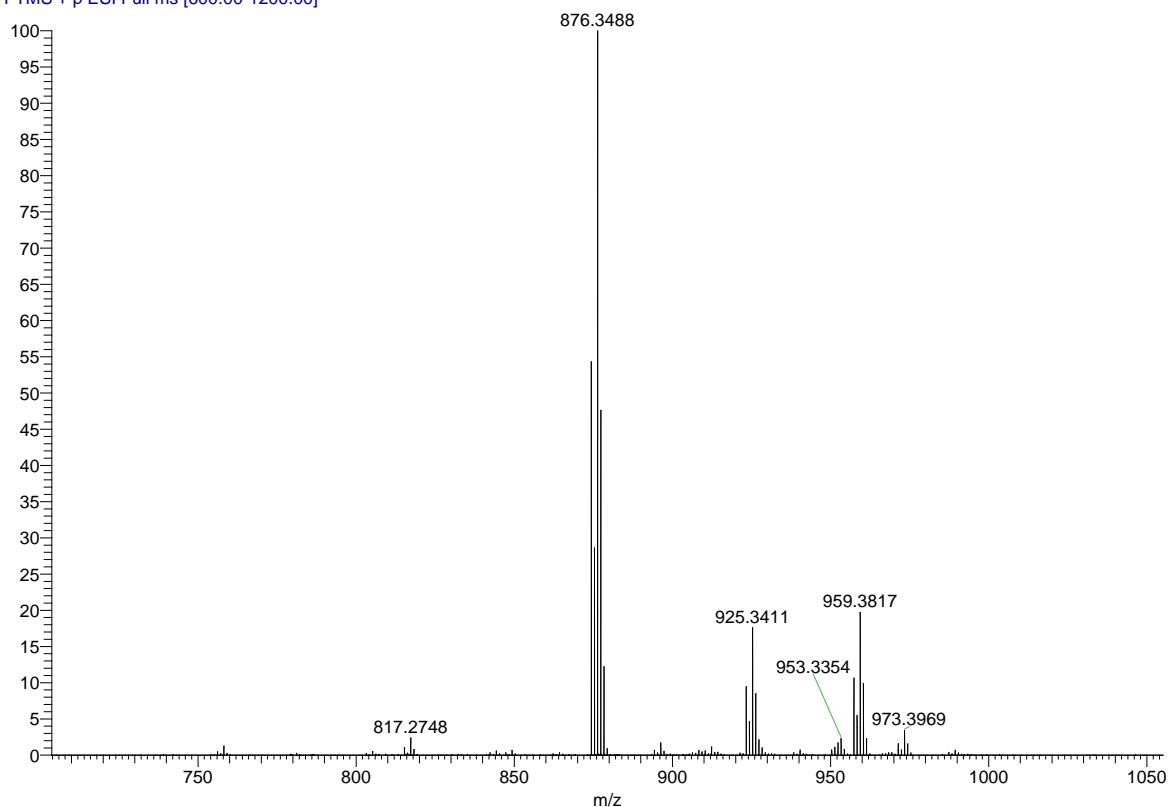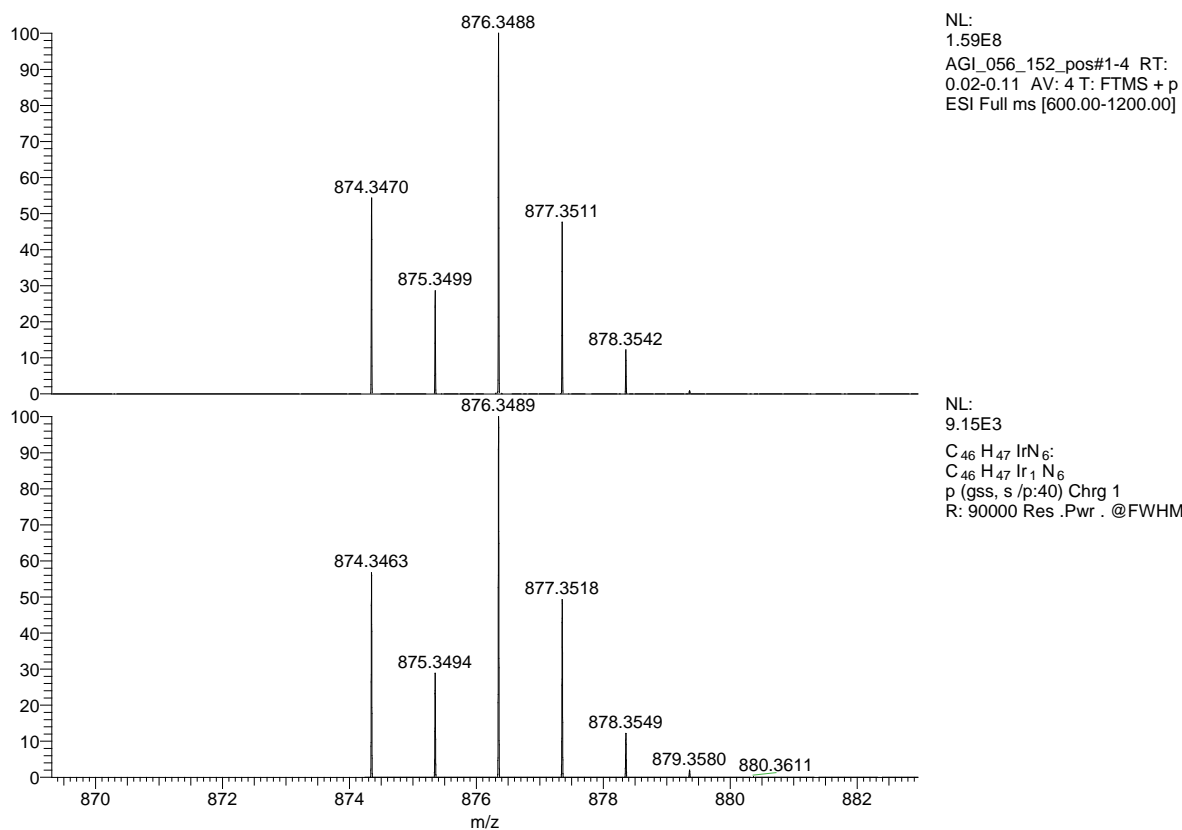

**Figure 12.** Electrospray ionization mass spectrum of Ir[TpMePC]tma<sub>2</sub>.

AGI\_058\_156 #1-4 RT: 0.02-0.12 AV: 4 NL: 9.42E6  
T: FTMS + p ESI Full ms [600.00-1000.00]

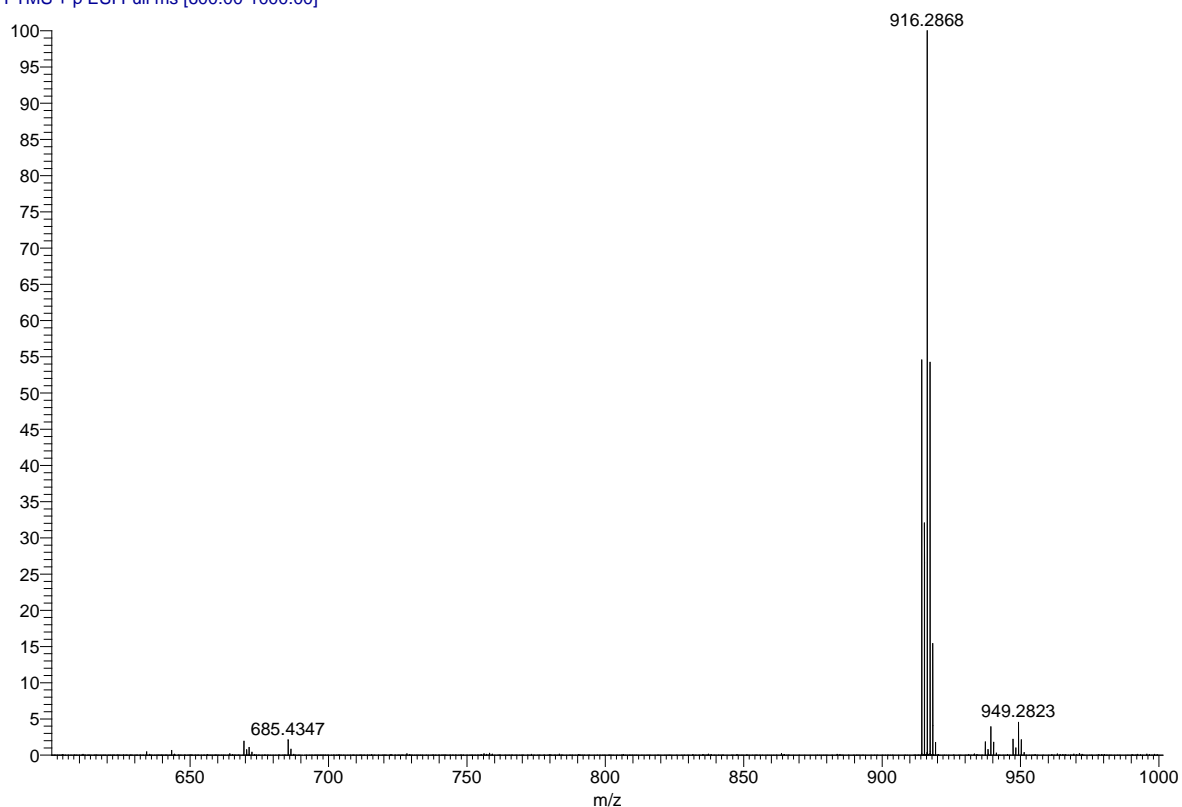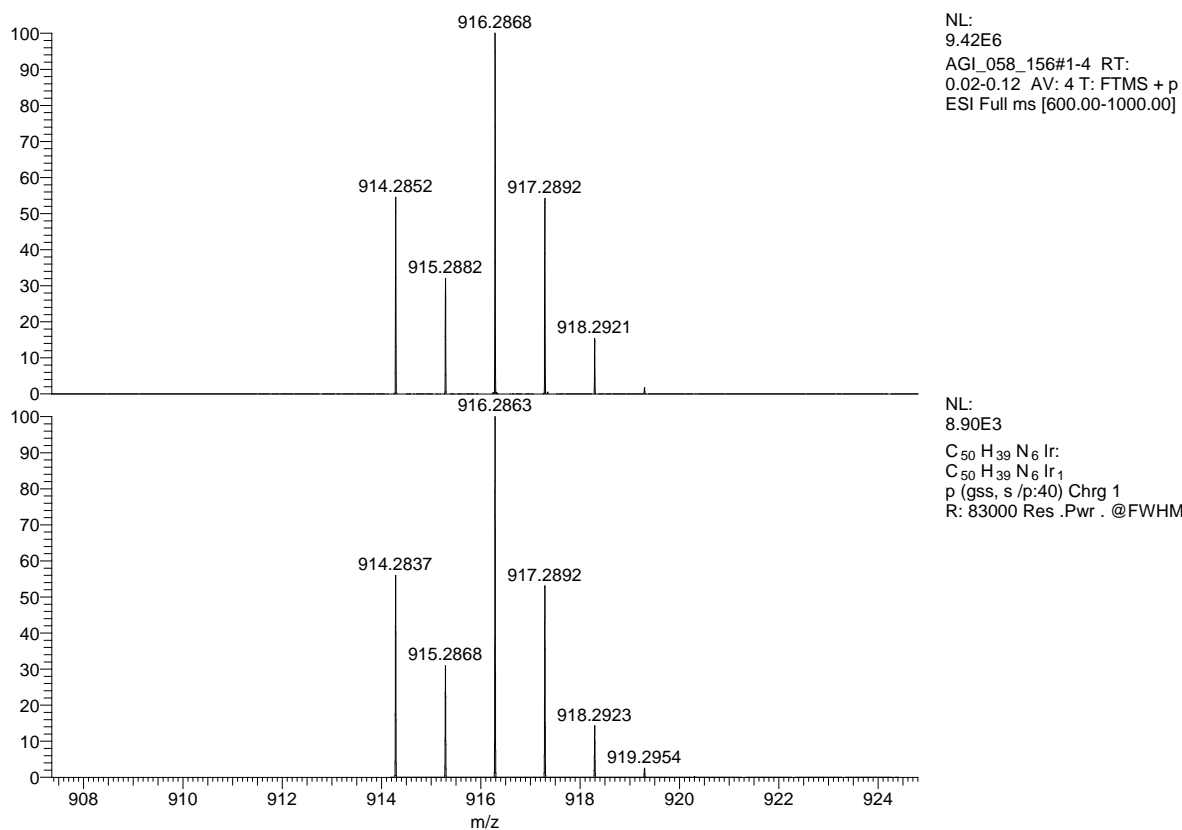

Figure 13. Electrospray ionization mass spectrum of Ir[TpMePC]py<sub>2</sub>.

AGI\_050\_144\_pos #1-5 RT: 0.00-0.11 AV: 5 NL: 2.13E7  
T: FTMS + p ESI Full ms [600.00-1200.00]

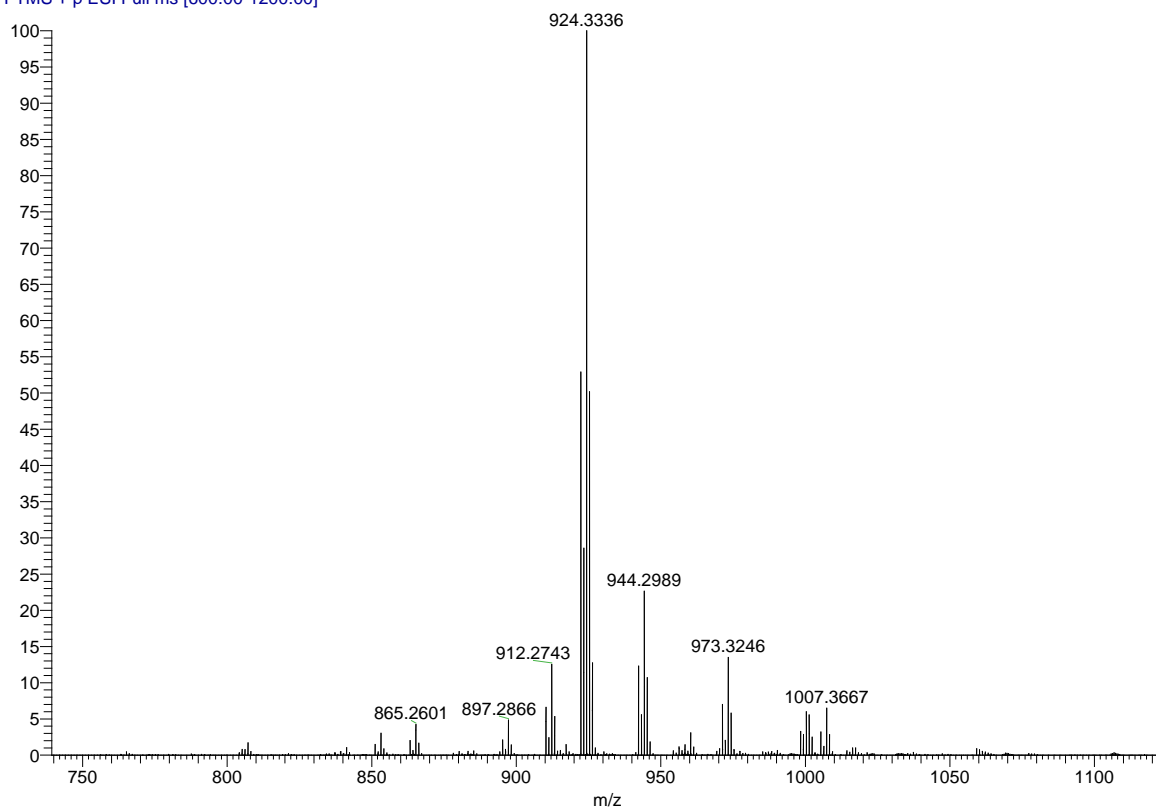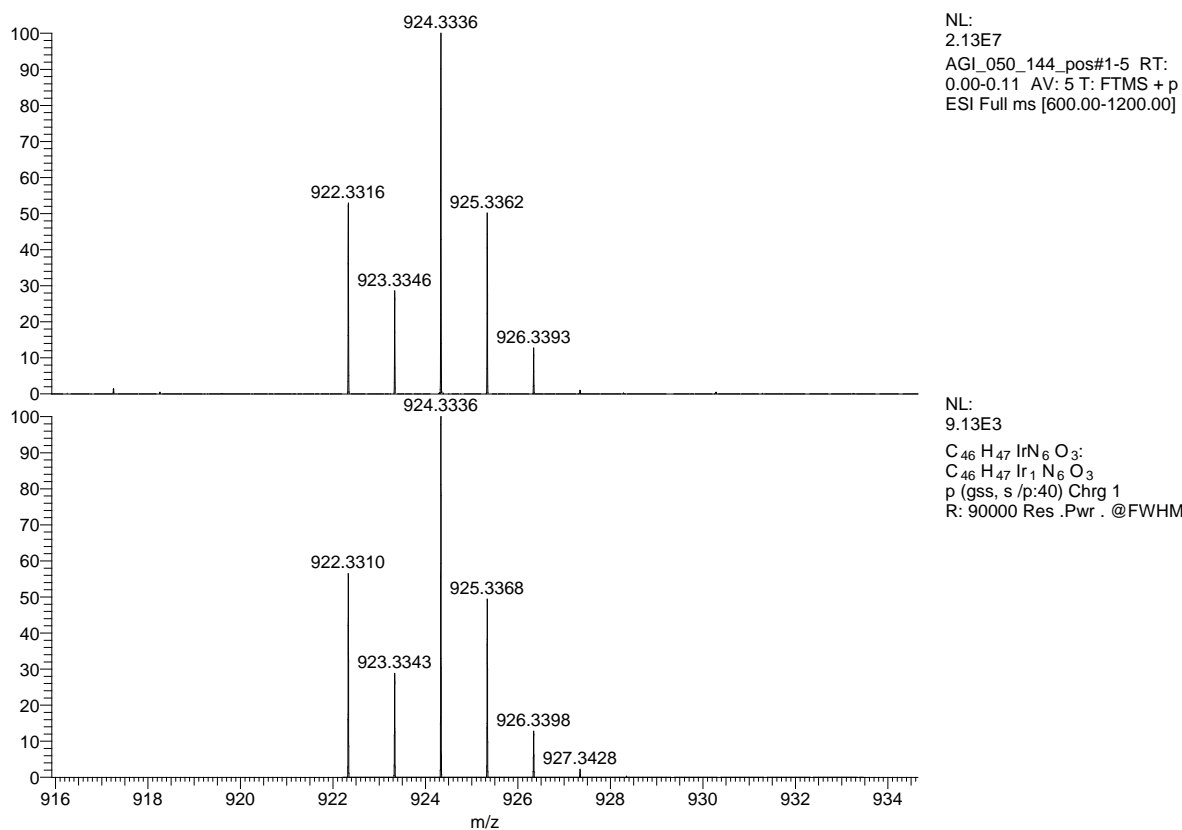

Figure 14. Electrospray ionization mass spectrum of Ir[TpOMePC]tma<sub>2</sub>.

p-OMe-py #6 RT: 0.14 AV: 1 NL: 8.58E7  
T: FTMS + p ESI Full ms [600.00-1200.00]

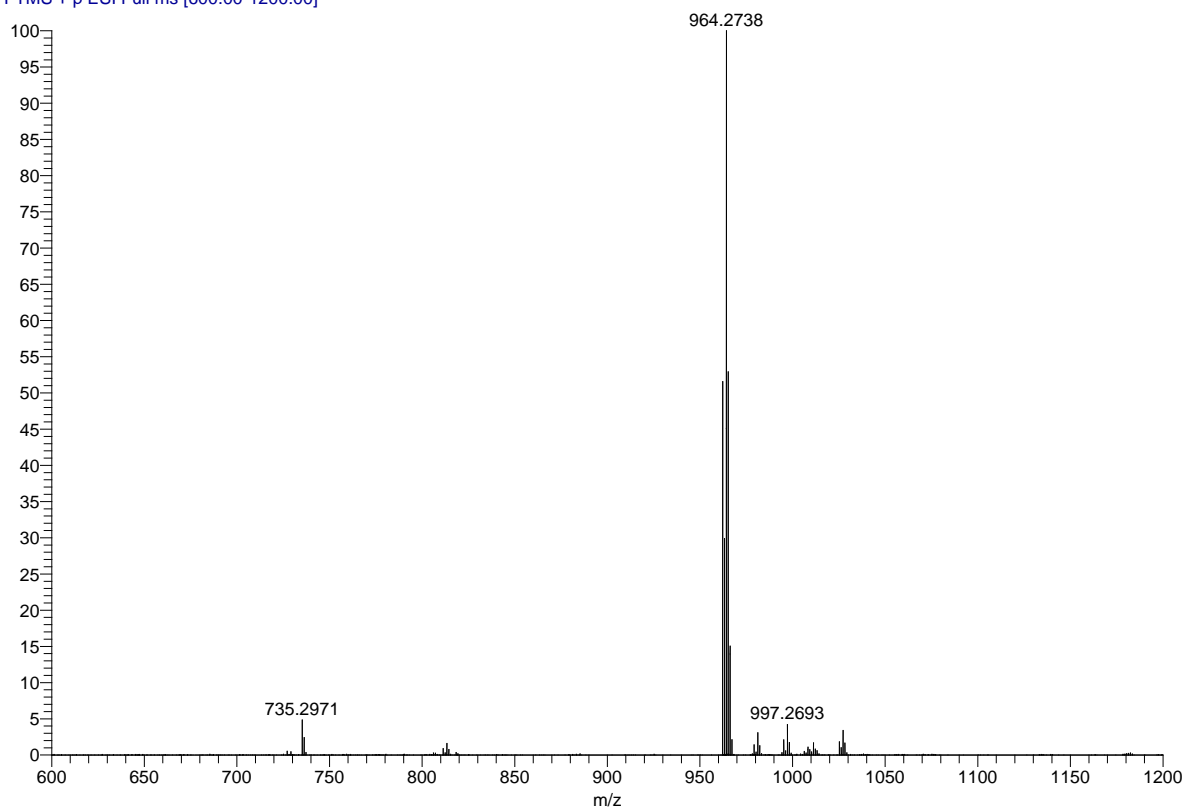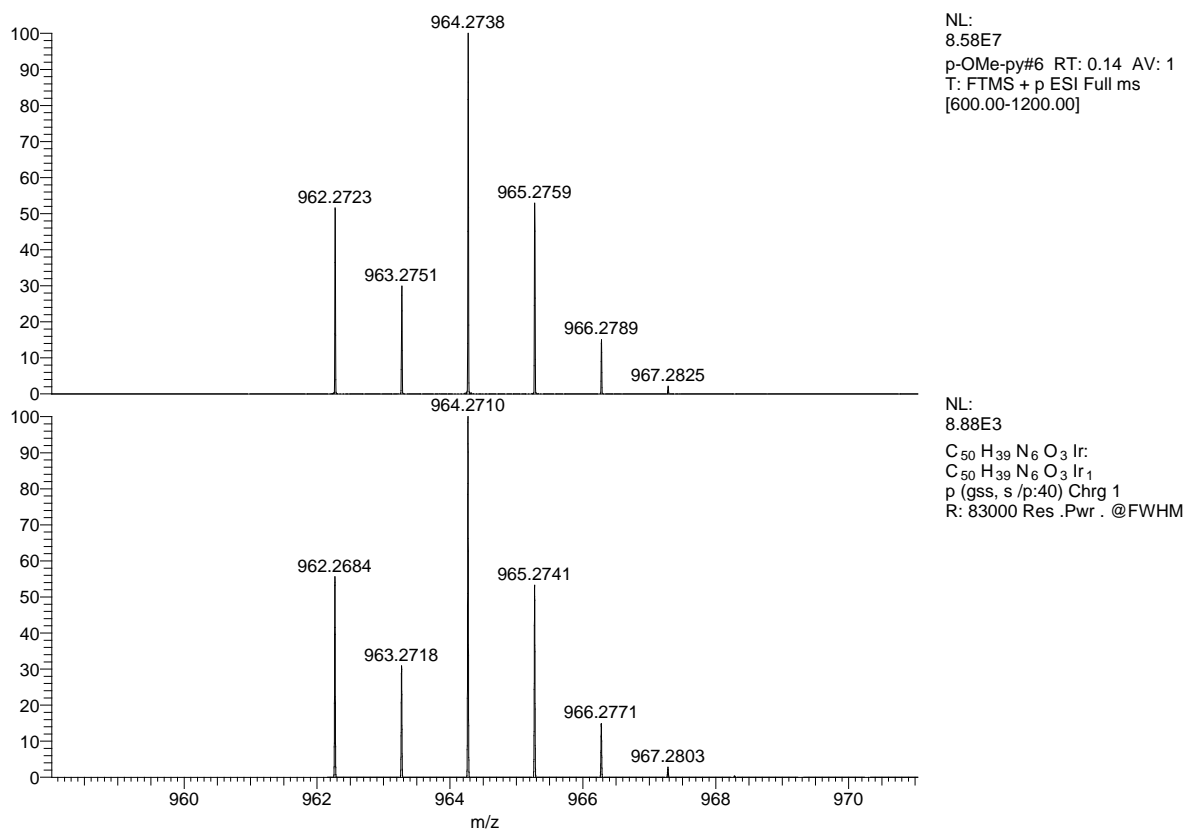

Figure 15. Electrospray ionization mass spectrum of Ir[TpOMePC]py<sub>2</sub>.

AGI\_055\_151\_pos #1-5 RT: 0.02-0.13 AV: 5 NL: 1.32E7  
T: FTMS + p ESI Full ms [600.00-1500.00]

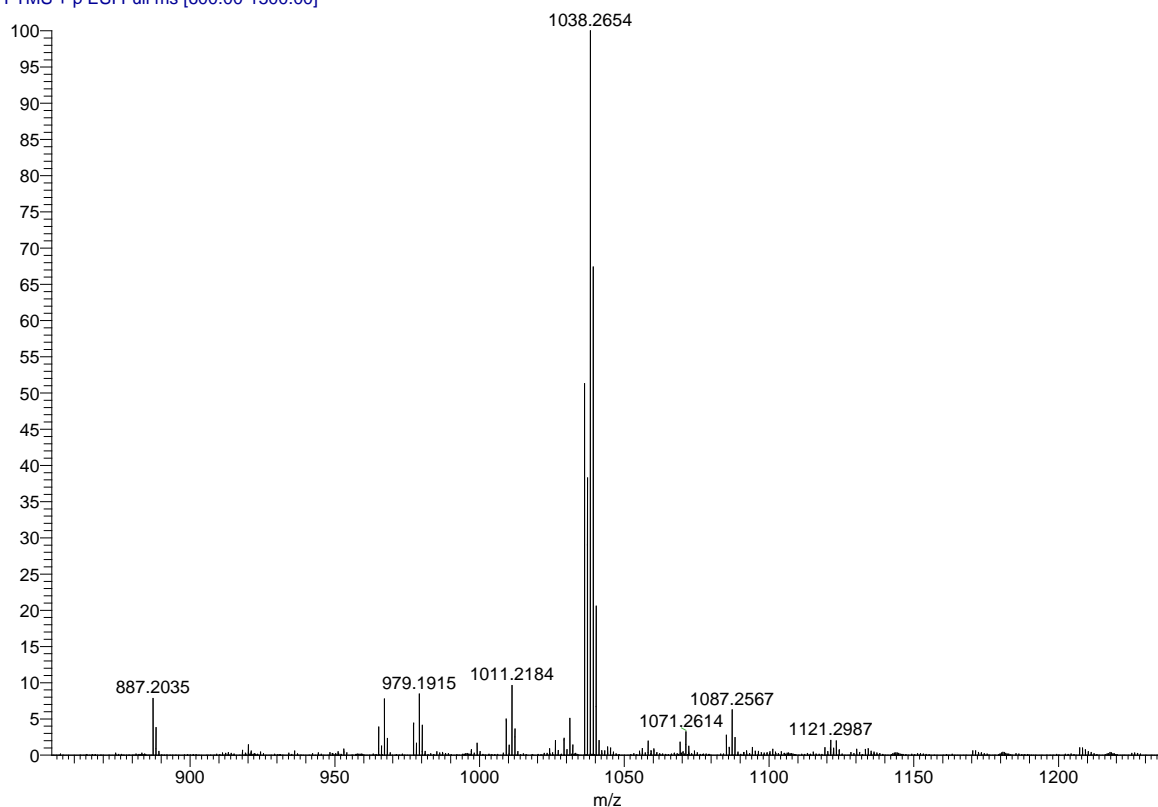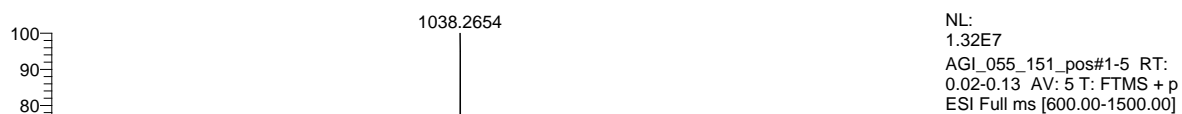

NL:  
1.32E7  
AGI\_055\_151\_pos#1-5 RT:  
0.02-0.13 AV: 5 T: FTMS + p  
ESI Full ms [600.00-1500.00]

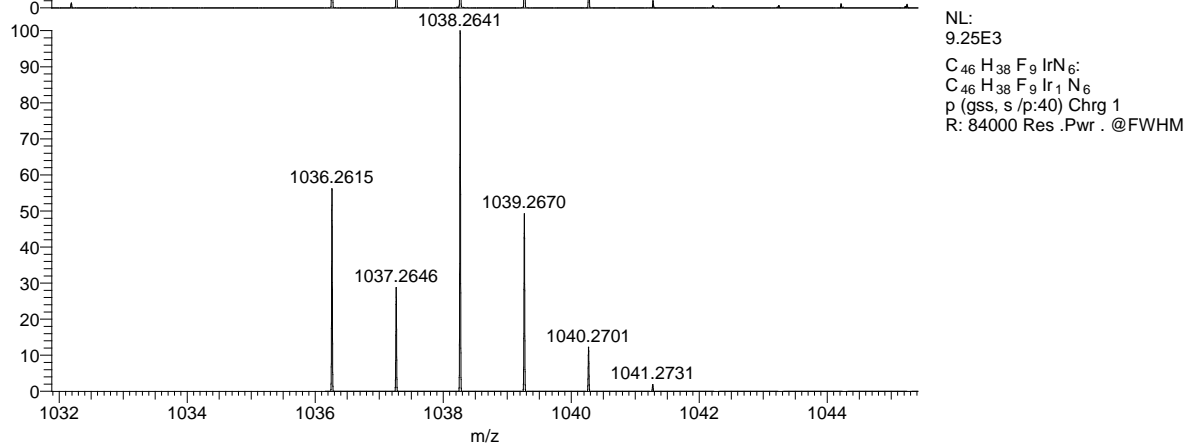

NL:  
9.25E3  
C<sub>46</sub> H<sub>38</sub> F<sub>9</sub> IrN<sub>6</sub>:  
C<sub>46</sub> H<sub>38</sub> F<sub>9</sub> Ir<sub>1</sub> N<sub>6</sub>  
p (gss, s /p:40) Chrg 1  
R: 84000 Res .Pwr . @FWHM

Figure 16. Electrospray ionization mass spectrum of Ir[TpCF<sub>3</sub>PC]tma<sub>2</sub>.

AGI\_068\_170\_pos #1-5 RT: 0.01-0.12 AV: 5 NL: 1.71E7  
T: FTMS + p ESI Full ms [600.00-1500.00]

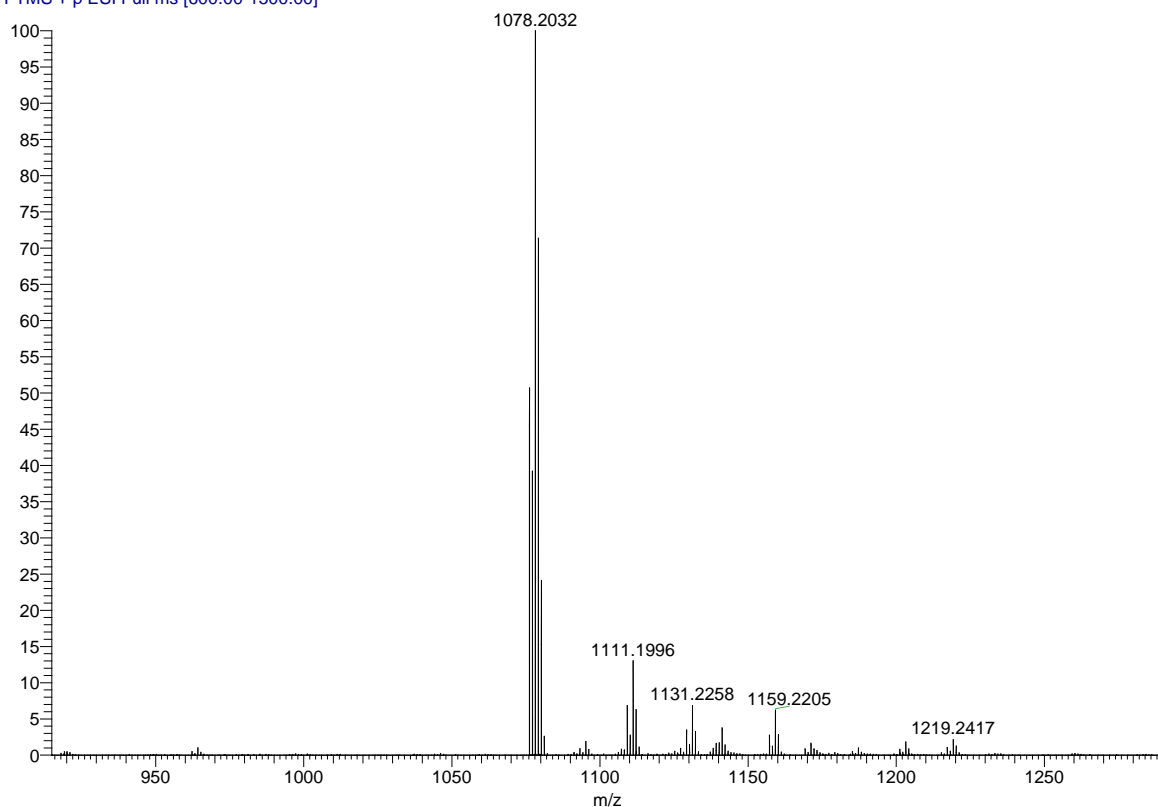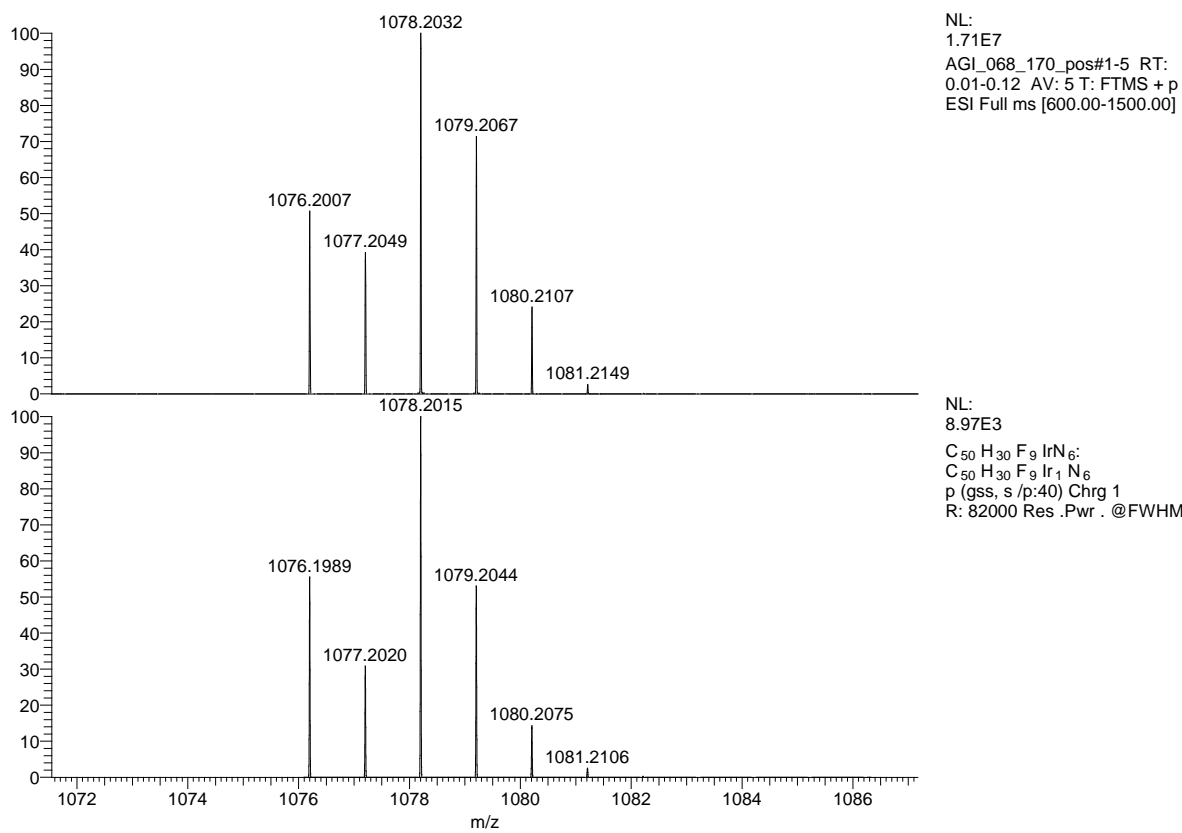

Figure 17. Electrospray ionization mass spectrum of Ir[TpCF<sub>3</sub>PC]py<sub>2</sub>.

IrpCF3\_DMAP #1-5 RT: 0.02-0.12 AV: 5 NL: 8.15E7  
T: FTMS + p ESI Full ms [600.00-2000.00]

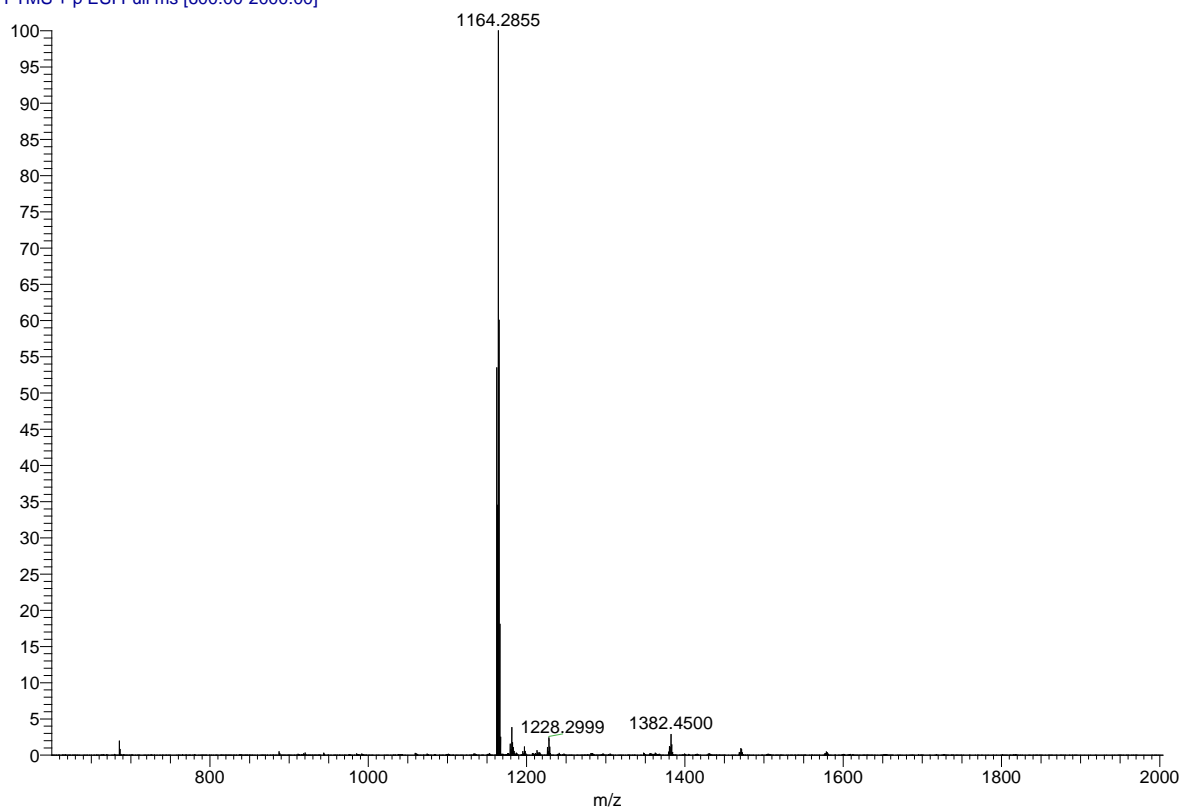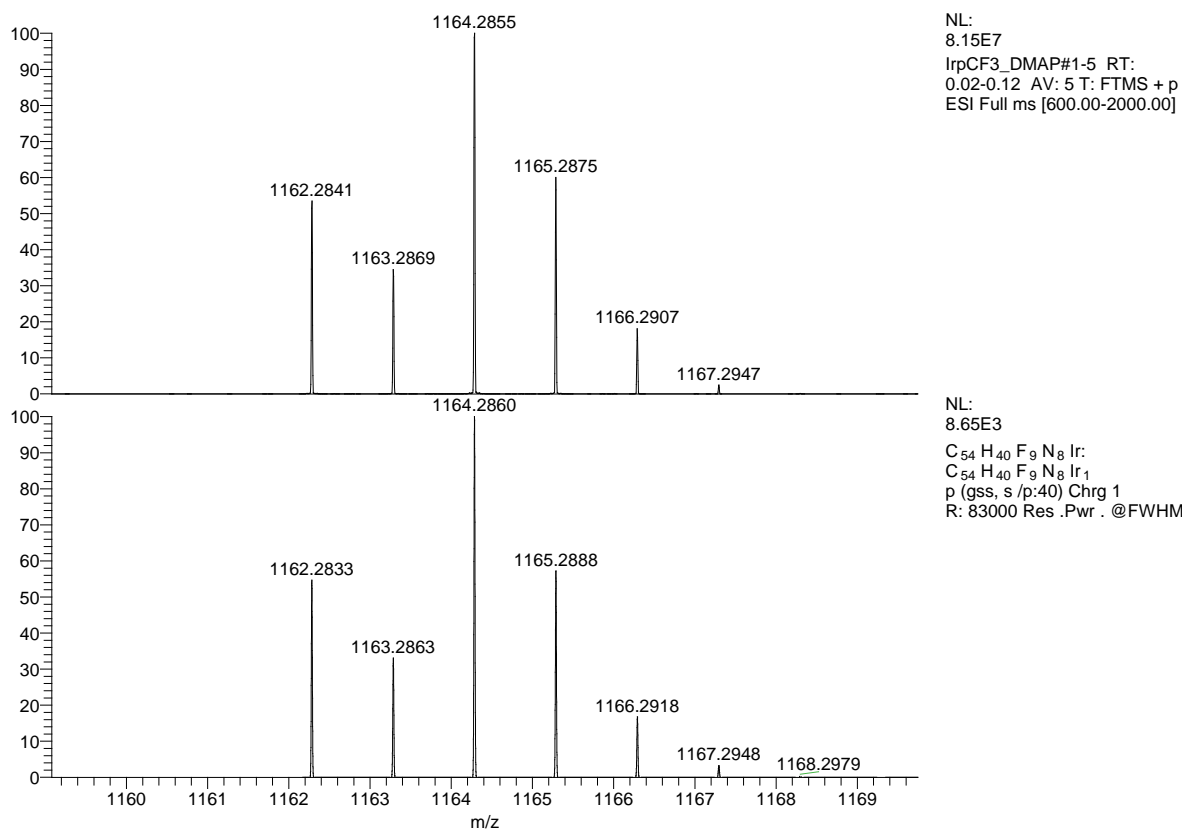

Figure 18. Electrospray ionization mass spectrum of Ir[TpCF<sub>3</sub>PC]dmap<sub>2</sub>.

IrpCF3\_4pico\_neg#1-4 RT: 0.02-0.11 AV: 4 NL: 5.60E5  
T: FTMS - p ESI Full ms [700.00-2000.00]

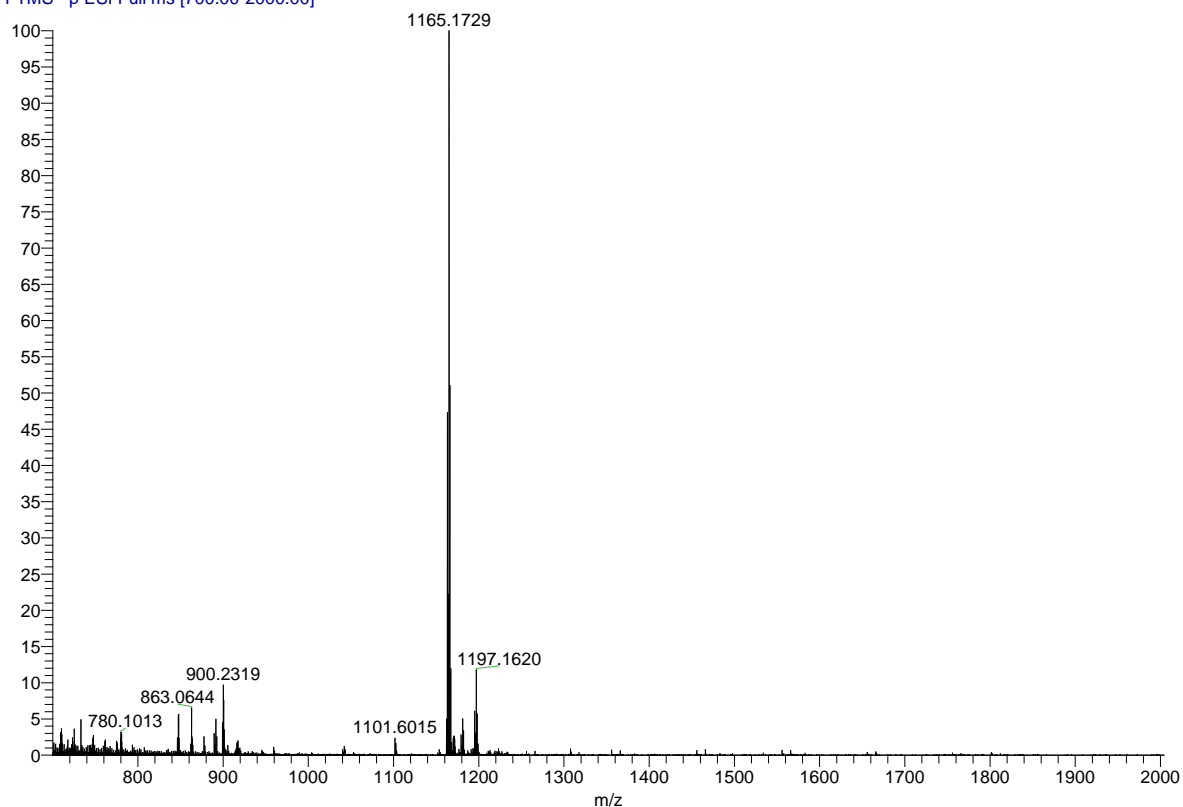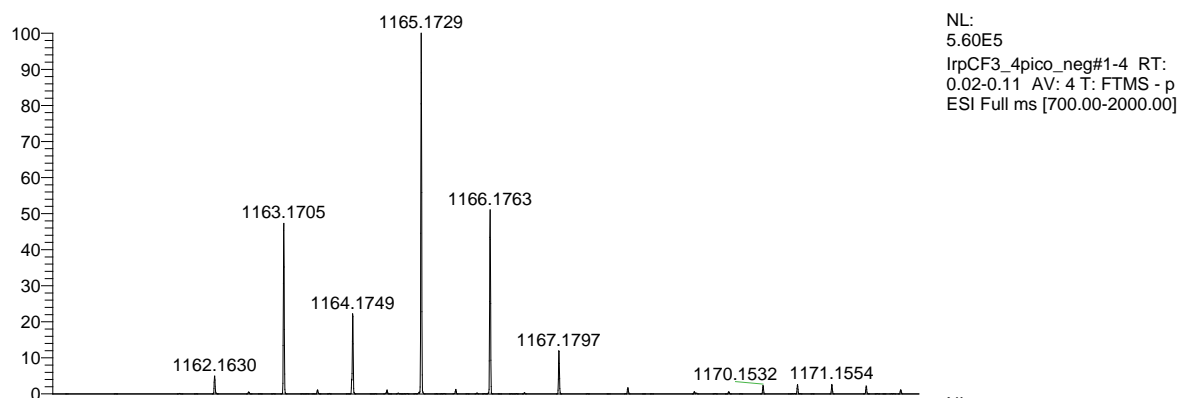

NL:  
5.60E5  
IrpCF3\_4pico\_neg#1-4 RT:  
0.02-0.11 AV: 4 T: FTMS - p  
ESI Full ms [700.00-2000.00]

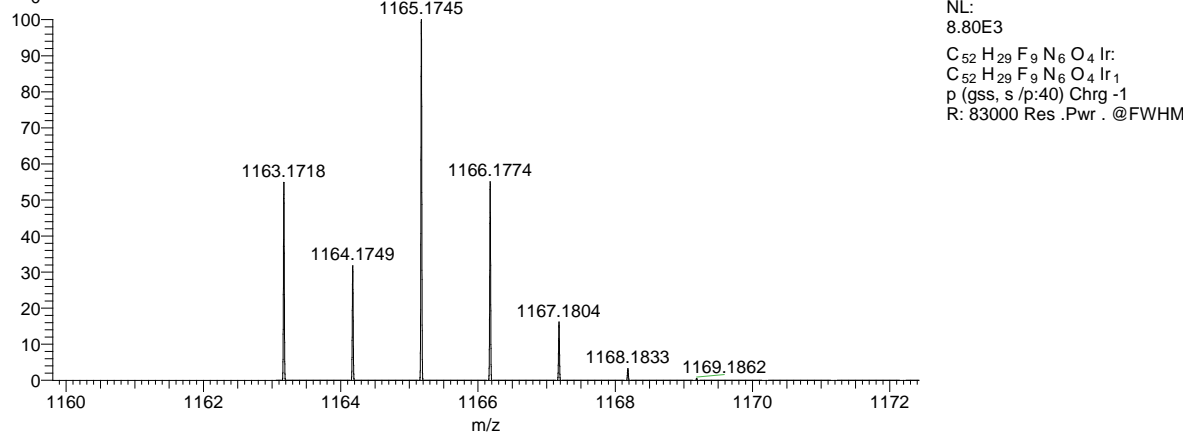

NL:  
8.80E3  
C<sub>52</sub> H<sub>29</sub> F<sub>9</sub> N<sub>6</sub> O<sub>4</sub> Ir:  
C<sub>52</sub> H<sub>29</sub> F<sub>9</sub> N<sub>6</sub> O<sub>4</sub> Ir<sub>1</sub>  
p (gss, s /p:40) Chrg -1  
R: 83000 Res .Pwr . @FWHM

Figure 19. Electrospray ionization mass spectrum of Ir[*Tp*CF<sub>3</sub>PC]4pa<sub>2</sub>.



IrpCF3\_isoquinoline\_b #2 RT: 0.03 AV: 1 NL: 6.88E7  
T: FTMS + p ESI Full ms [700.00-2000.00]

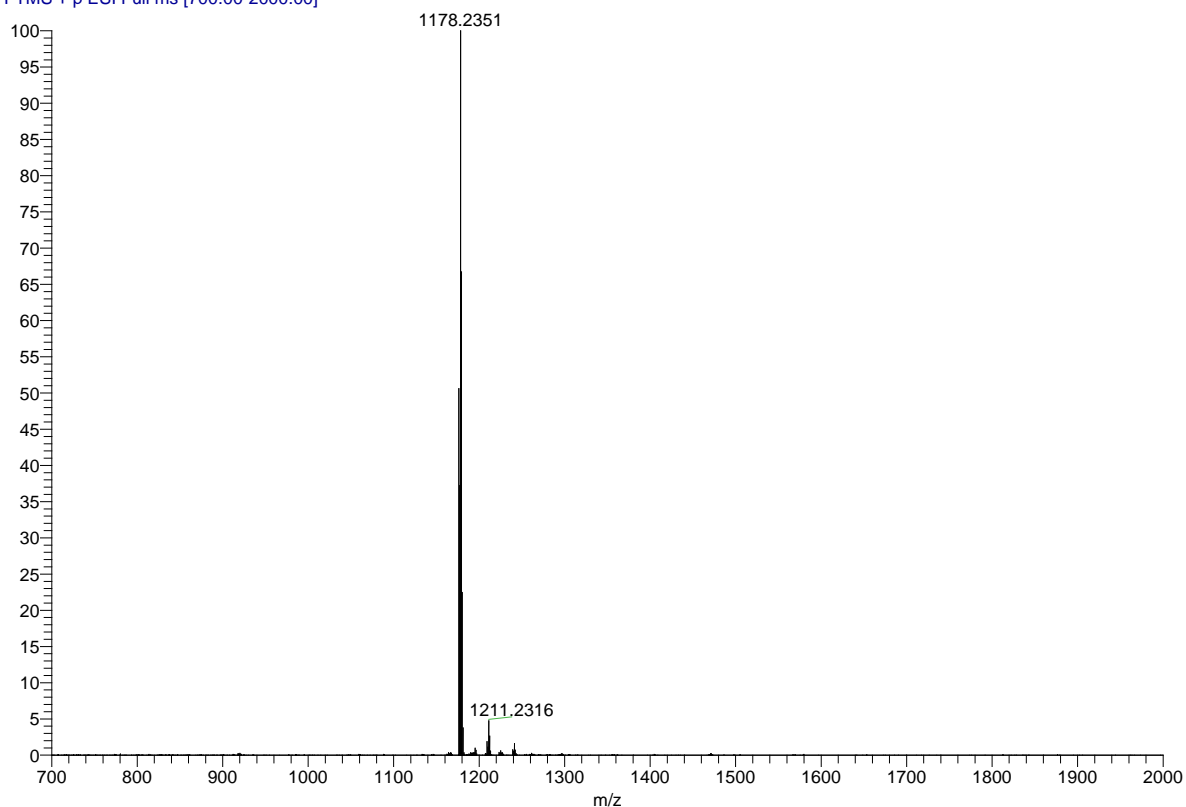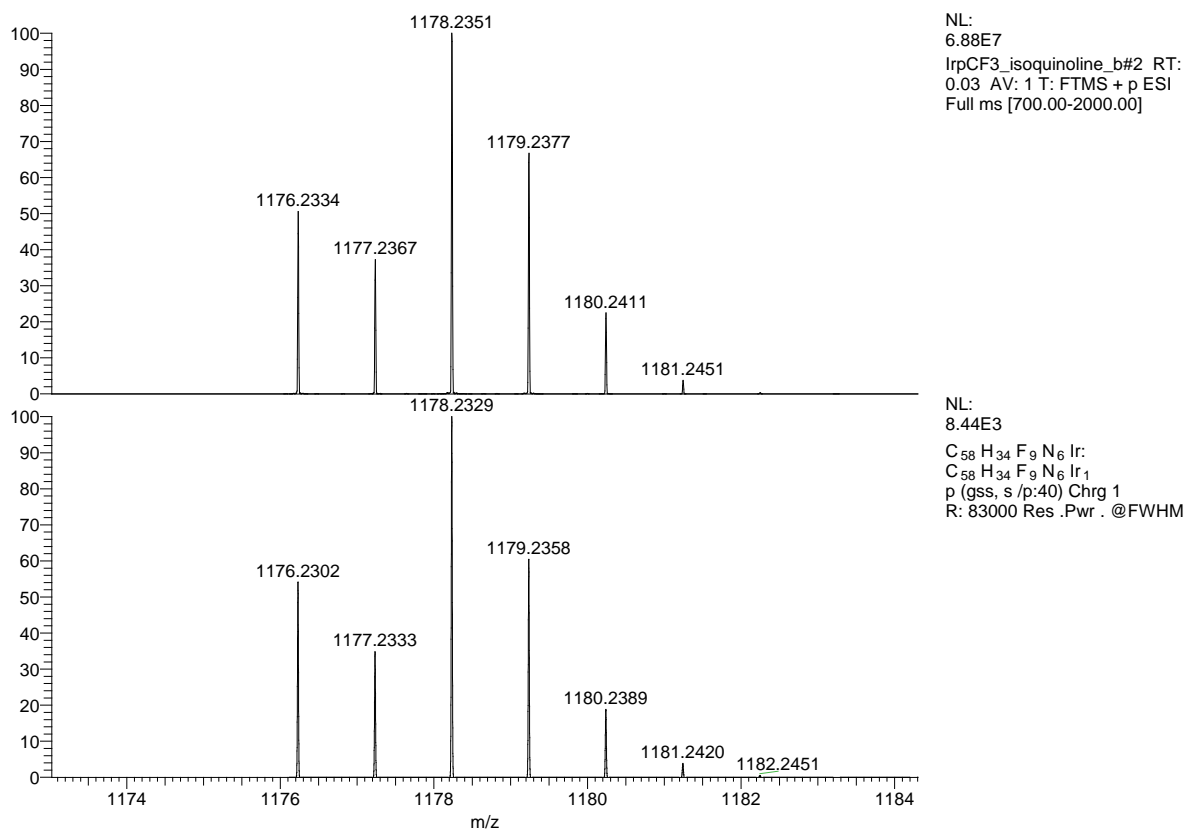

Figure 20. Electrospray ionization mass spectrum of Ir[*Tp*CF<sub>3</sub>PC]isoq<sub>2</sub>.

### C. $^1\text{H}$ NMR spectra

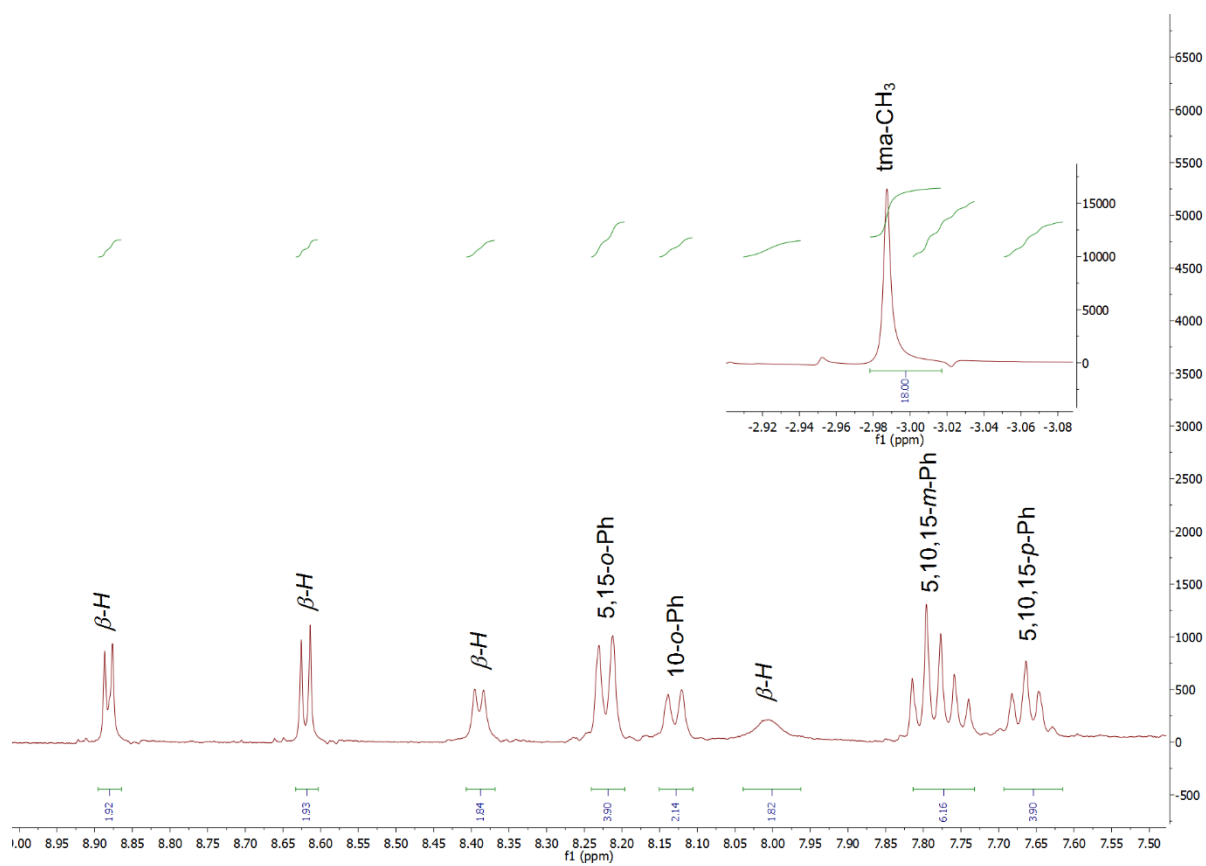

**Figure 21.**  $^1\text{H}$  NMR spectrum of Ir[TPC]tma<sub>2</sub> in acetone-*d*<sub>6</sub>.

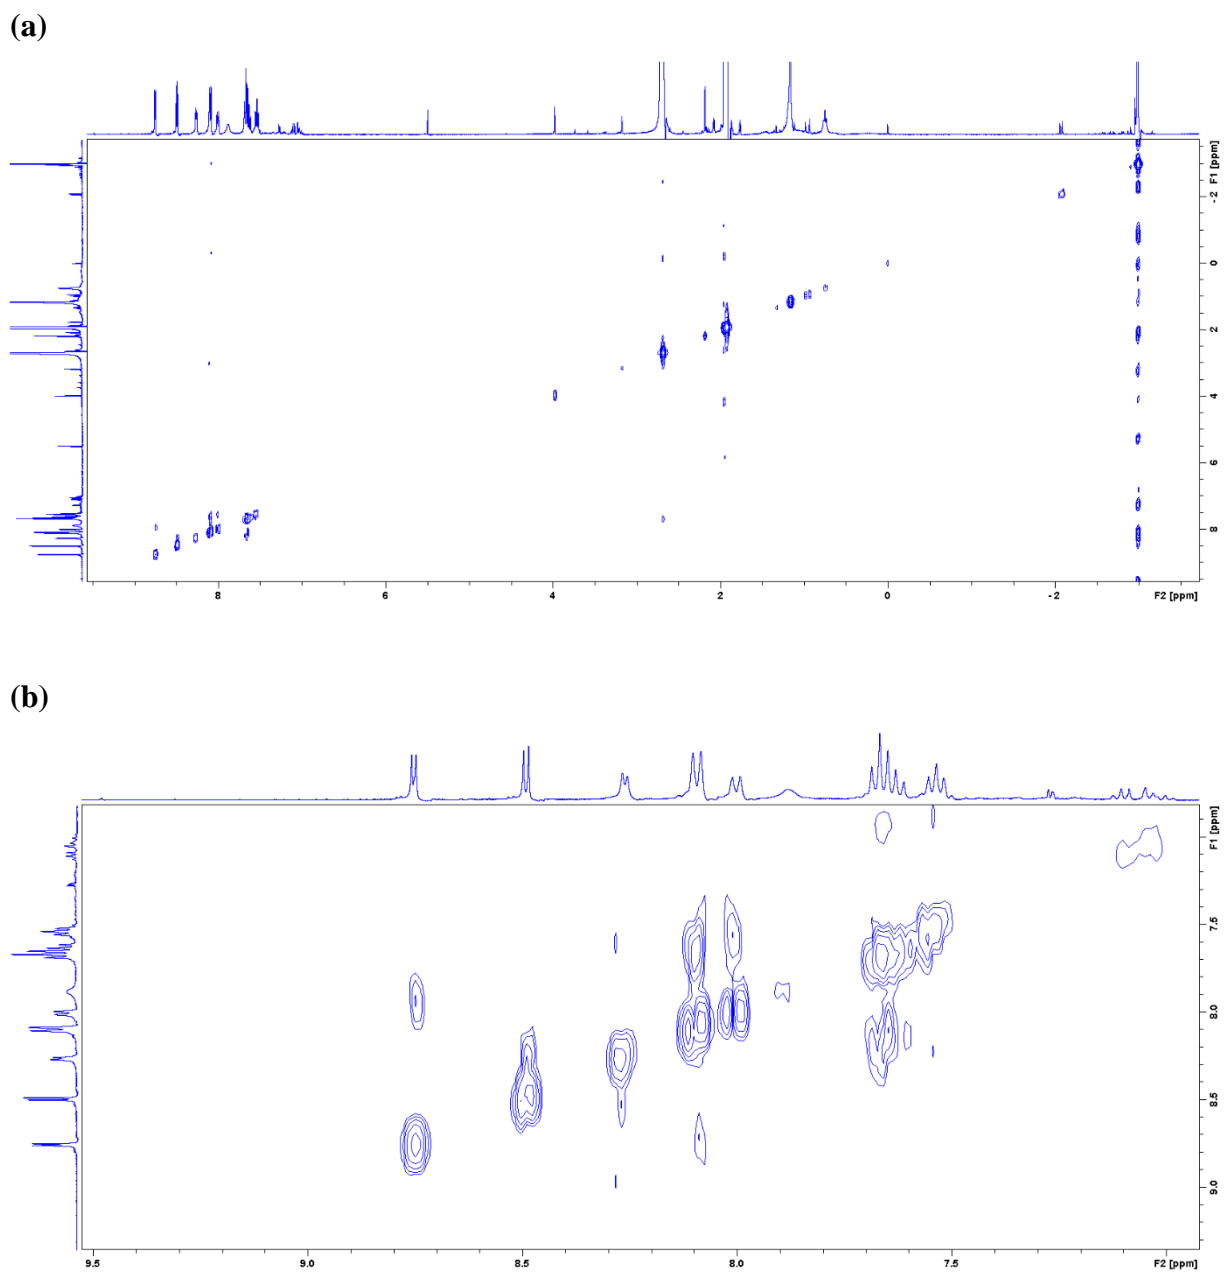

**Figure 22.** (a) COSY of Ir[TPC]tma<sub>2</sub> in acetone-*d*<sub>6</sub>. (b) Close-up of aromatic area.

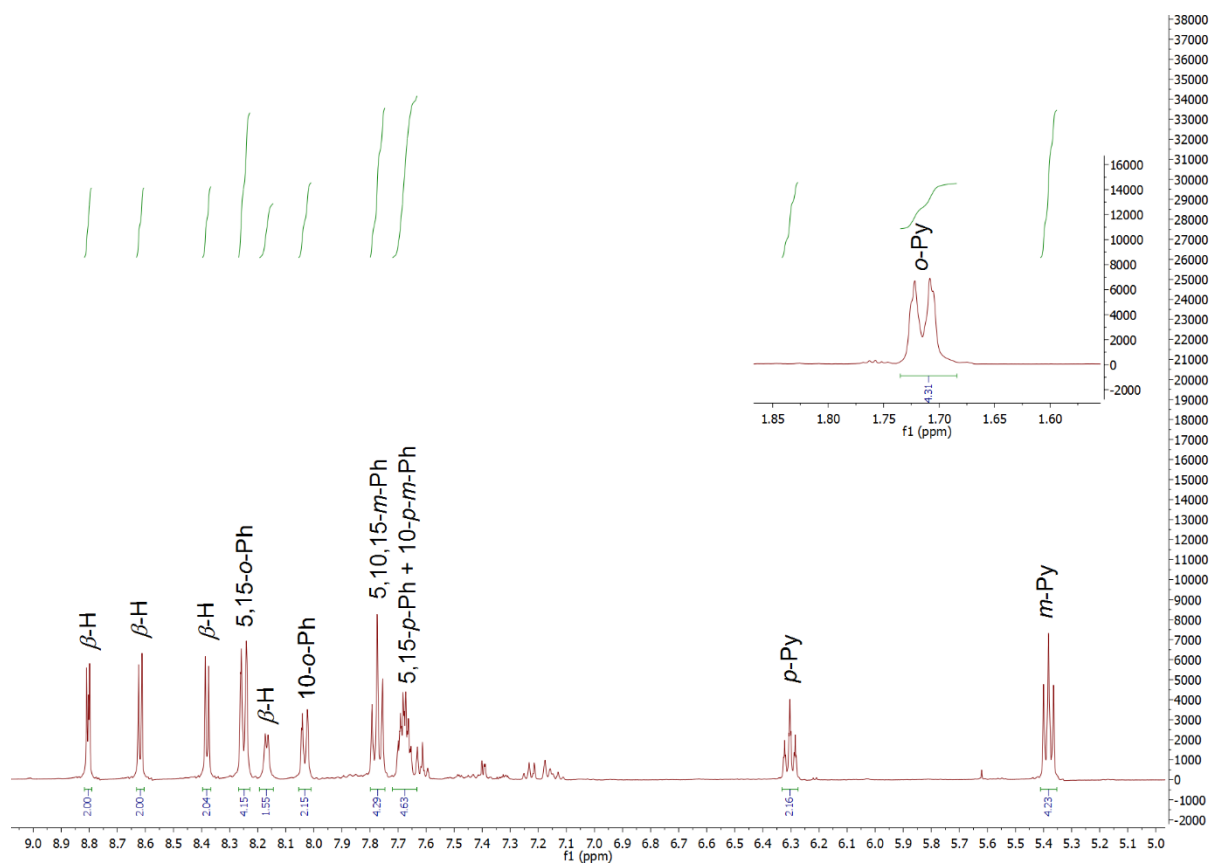

**Figure 23.**  $^1\text{H}$  NMR spectrum of  $\text{Ir}[\text{TPC}]\text{py}_2$  in  $\text{acetone-}d_6$ .

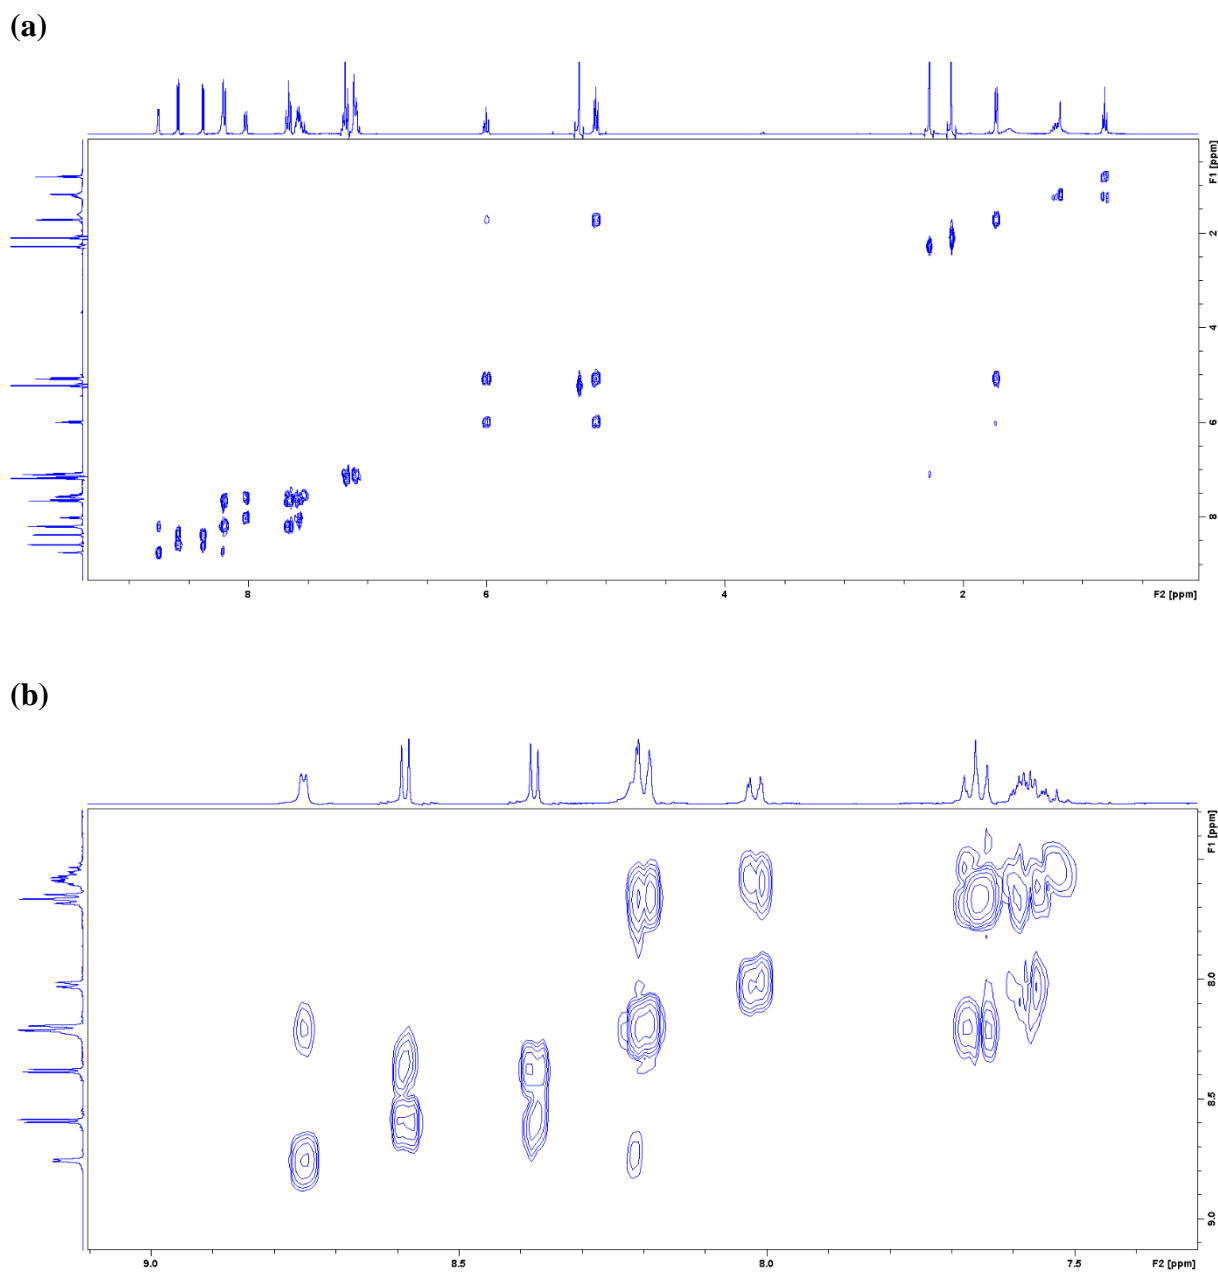

**Figure 24.** (a) COSY of Ir[TPC]py<sub>2</sub> in acetone-*d*<sub>6</sub>. (b) Close-up of aromatic area.

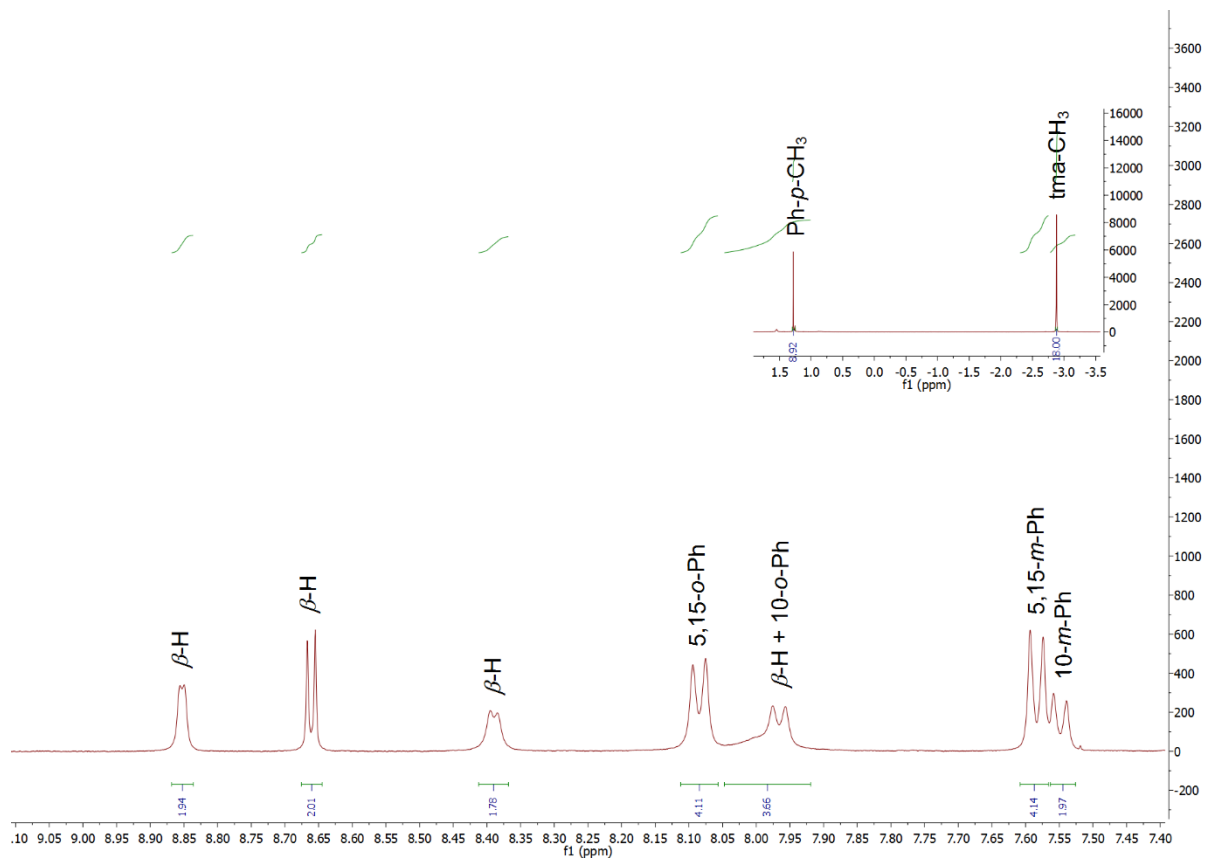

**Figure 25.**  $^1\text{H}$  NMR spectrum of  $\text{Ir}[\text{TpMePC}]\text{tma}_2$  in chloroform-*d*.

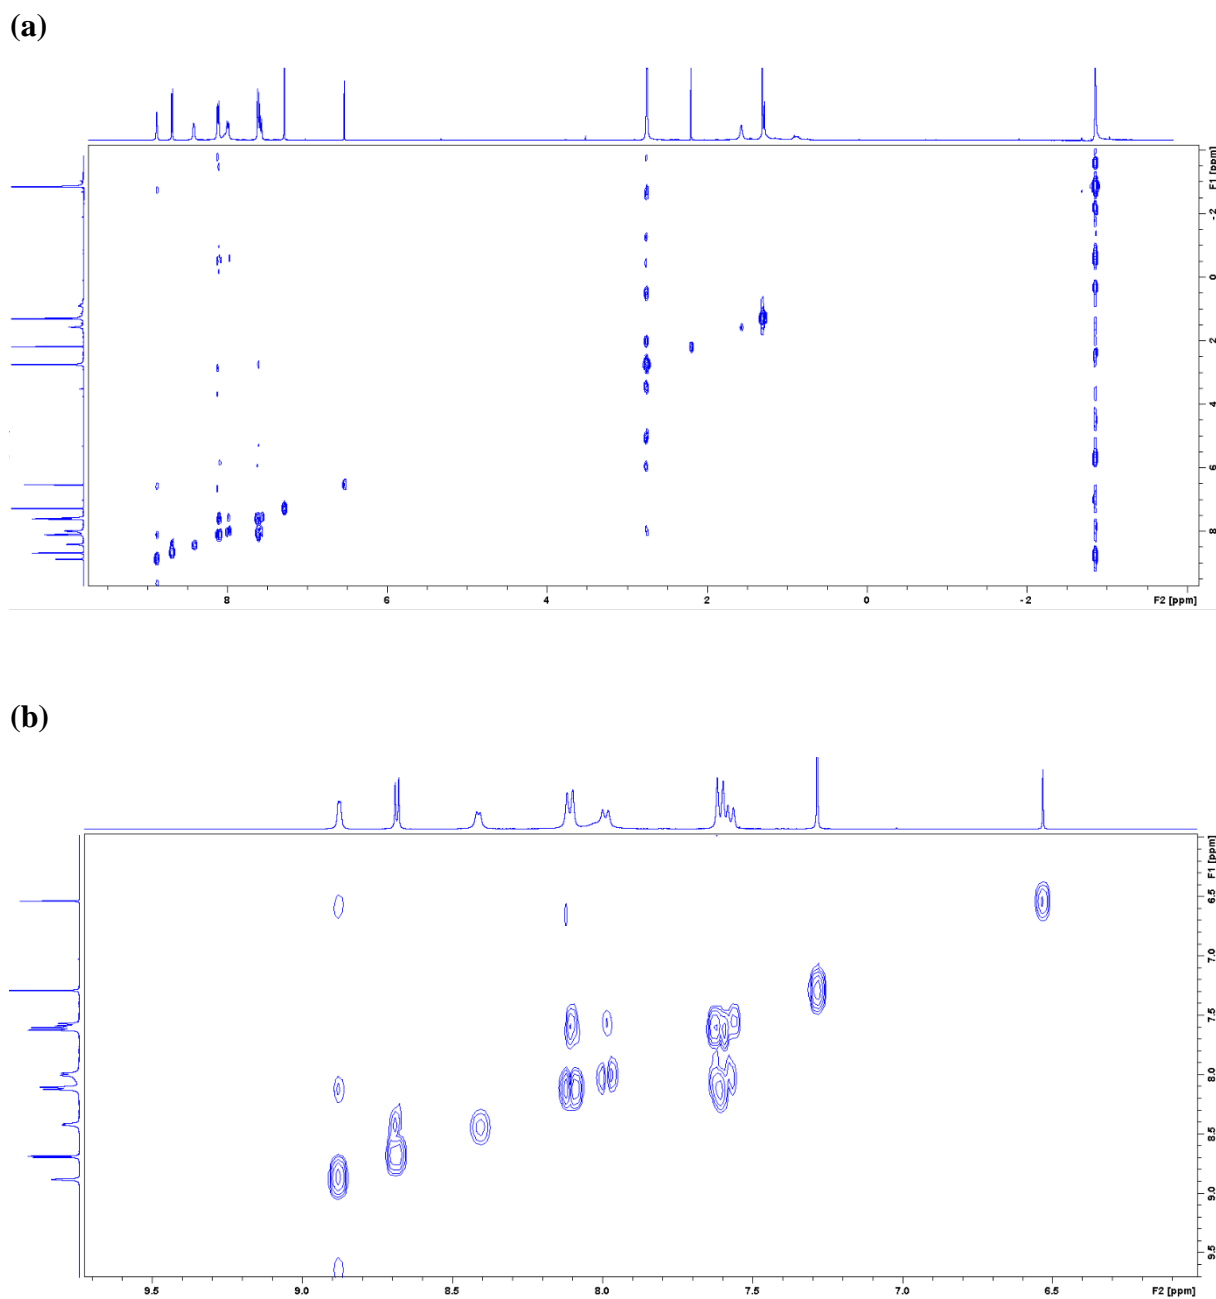

**Figure 26.** (a) COSY of Ir[*TpMePC*]tma<sub>2</sub> in chloroform-*d*. (b) Close-up of aromatic area.

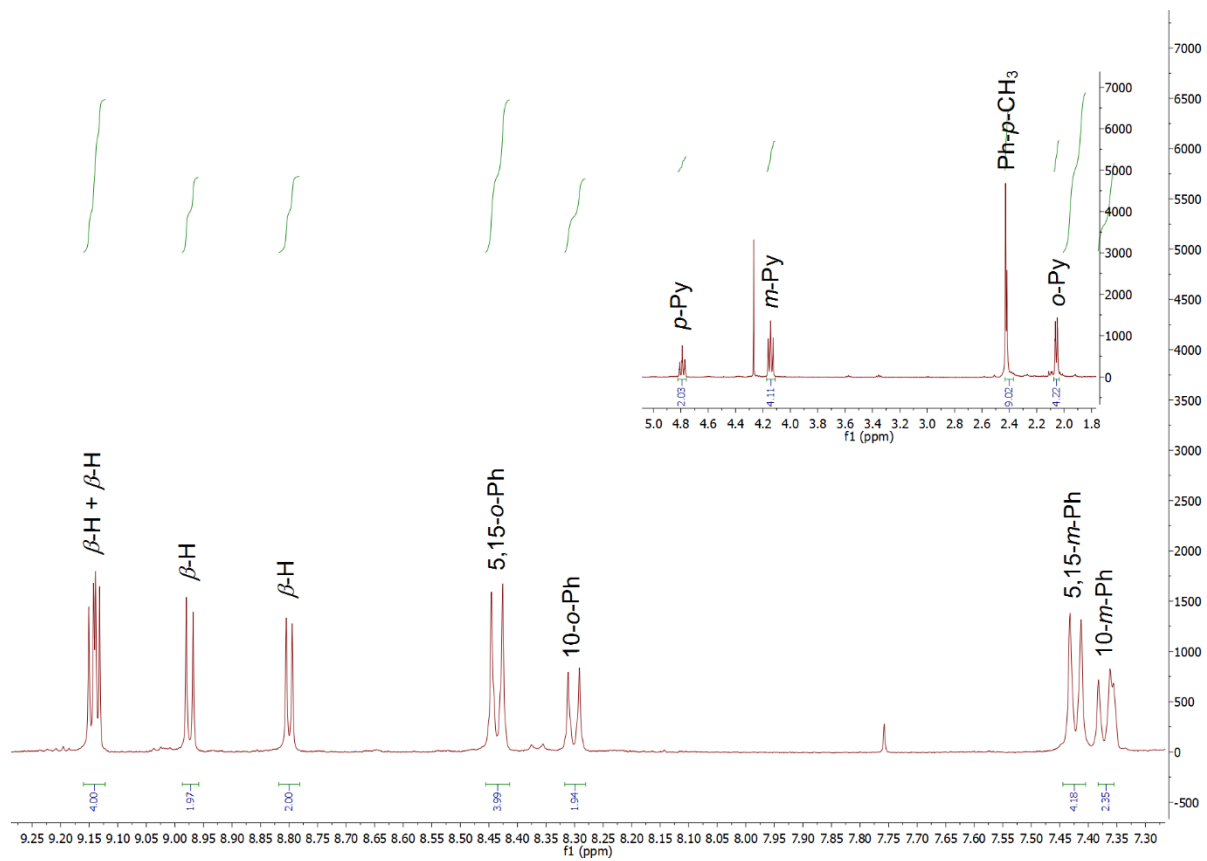

**Figure 27.**  $^1\text{H}$  NMR spectrum of  $\text{Ir}[\text{TpMePC}]\text{py}_2$  in  $\text{benzene-}d_6$ .



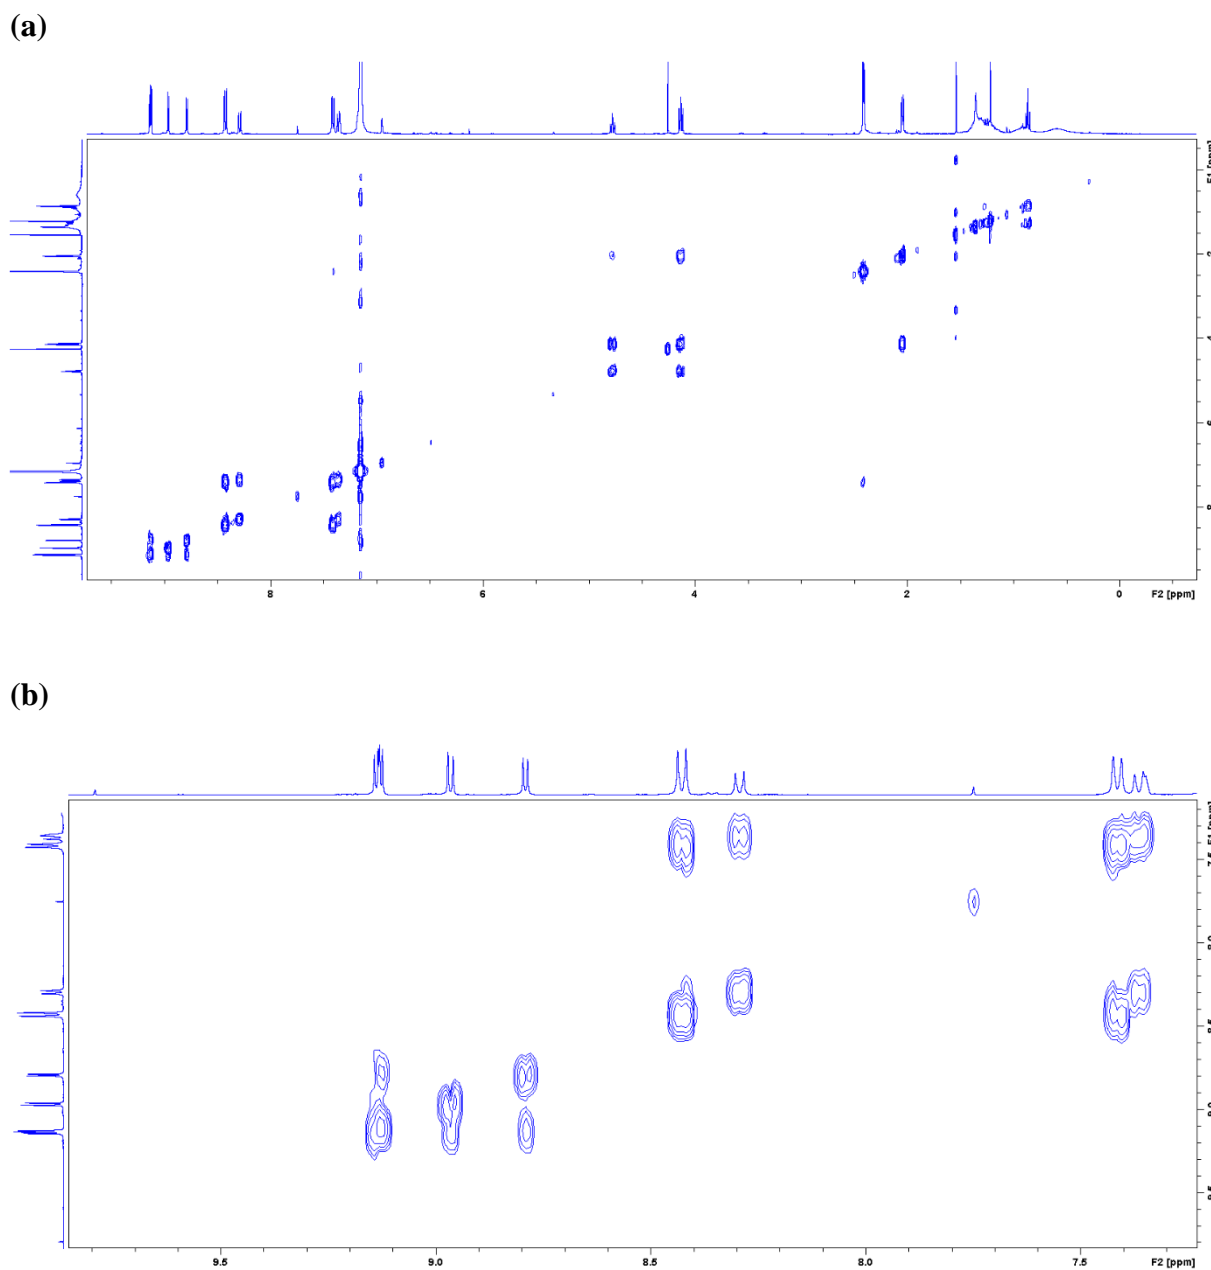

**Figure 28.** (a) COSY of Ir[TpMePC]py<sub>2</sub> in benzene-*d*<sub>6</sub>. (b) Close-up of aromatic area.

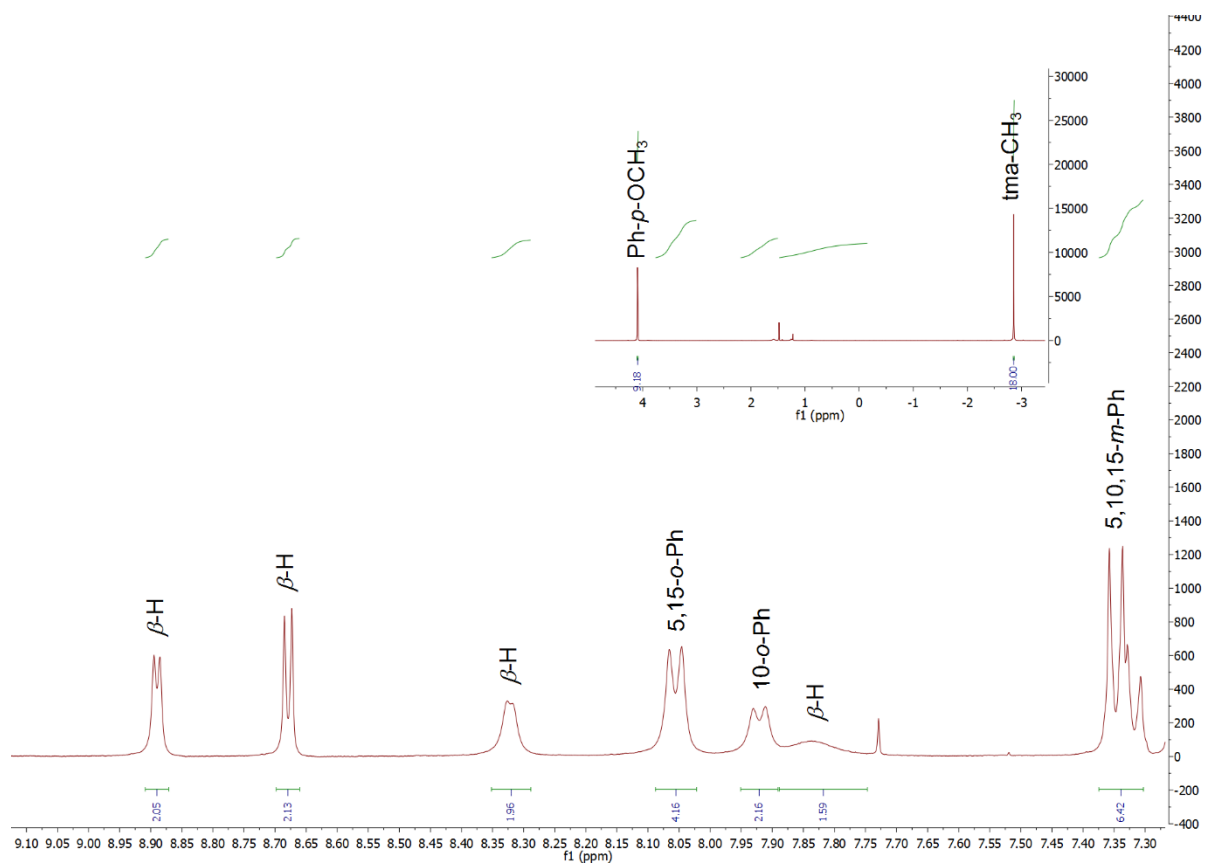

**Figure 29.**  $^1\text{H}$  NMR spectrum of  $\text{Ir}[\text{TpOMePC}]\text{tma}_2$  in chloroform-*d*.

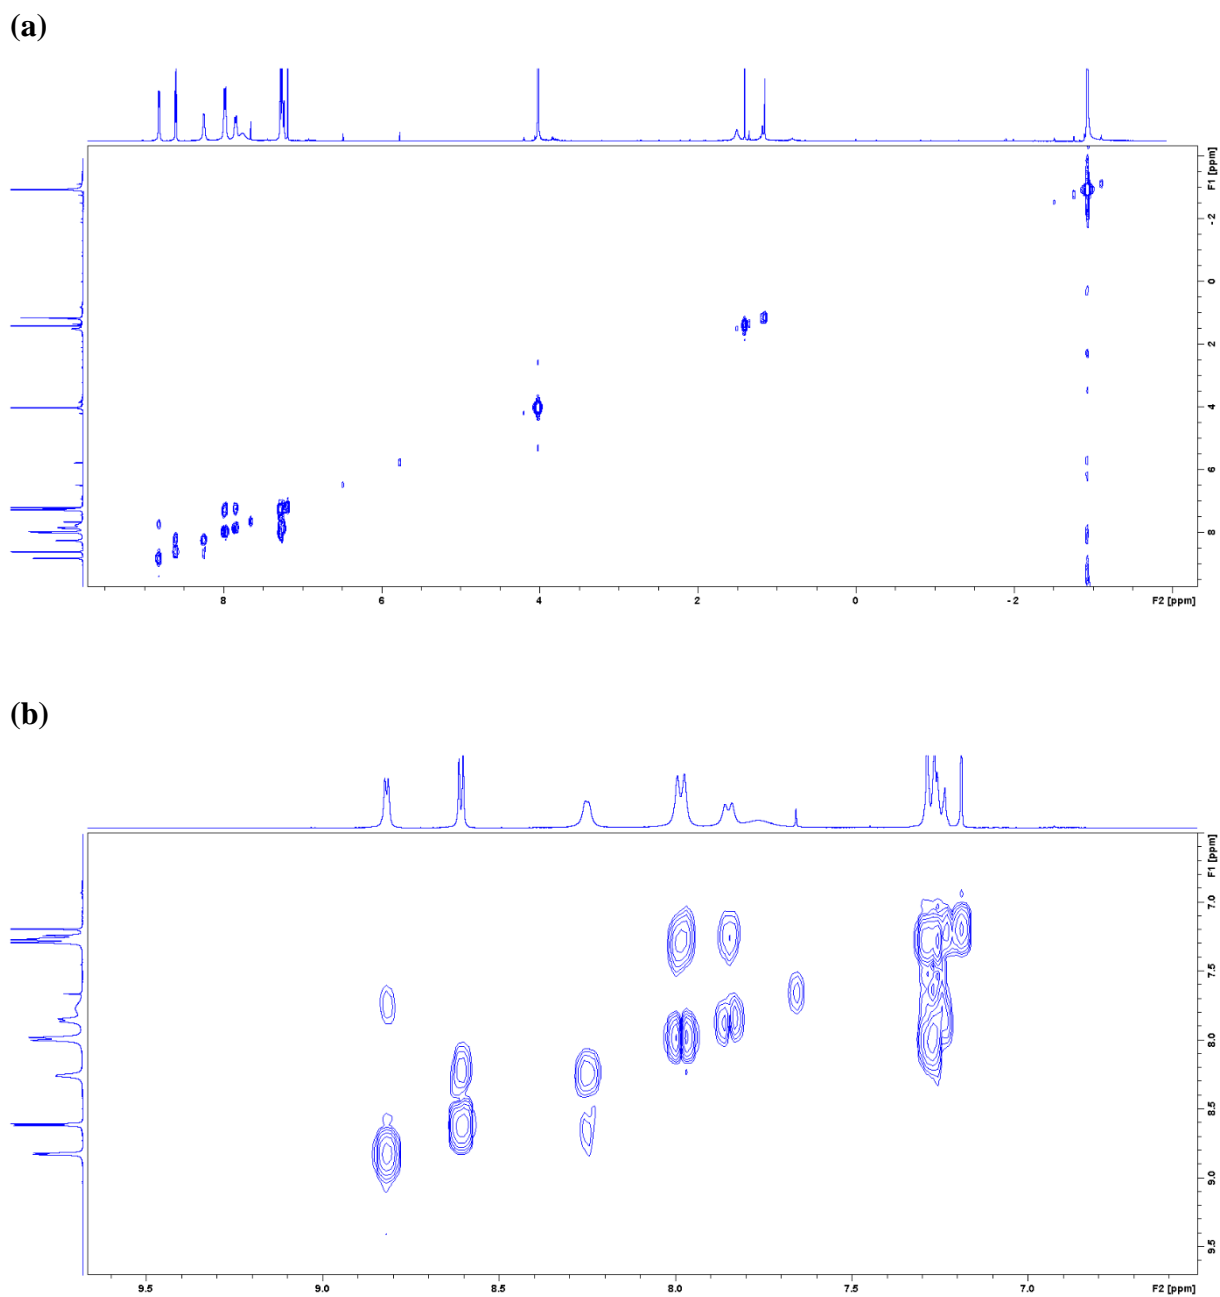

**Figure 30.** (a) COSY of Ir[TpOMePC]tma<sub>2</sub> in chloroform-*d*. (b) Close-up of aromatic area.

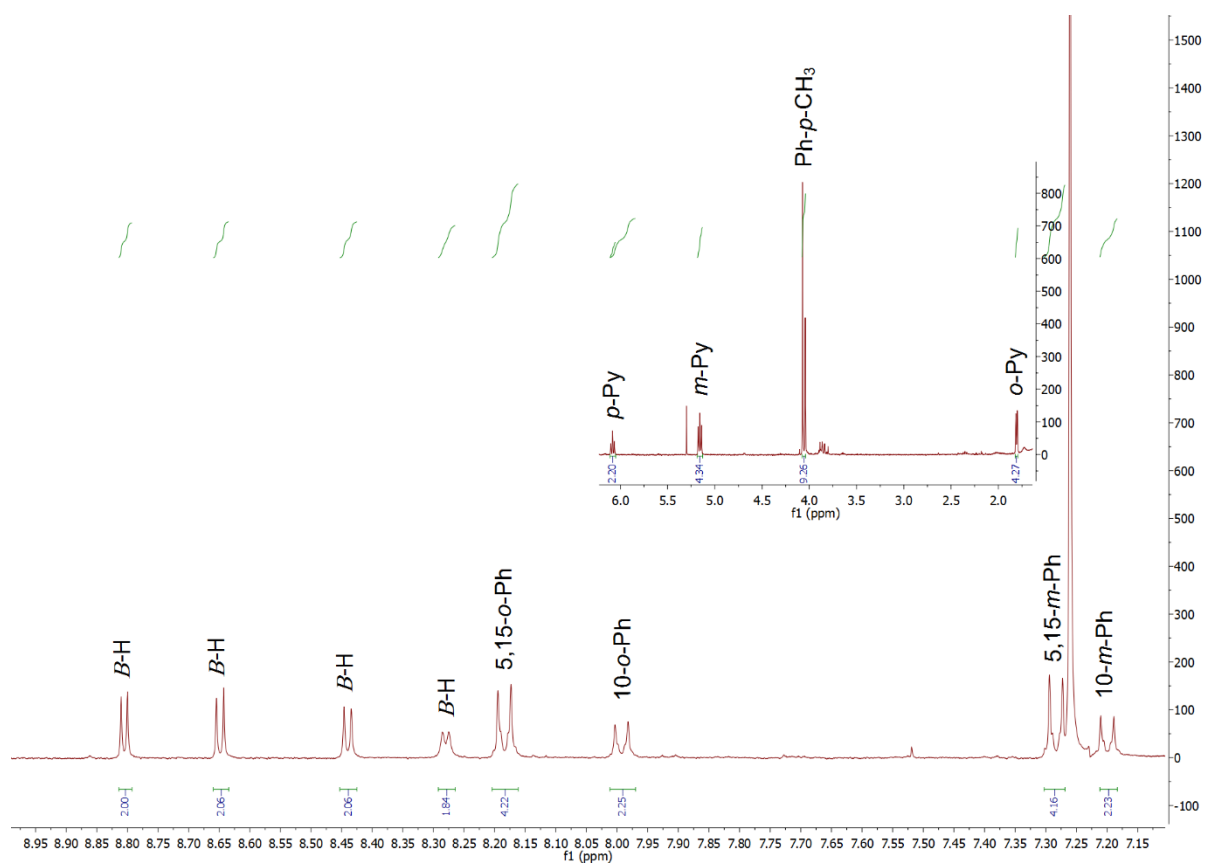

**Figure 31.**  $^1\text{H}$  NMR spectrum of  $\text{Ir}[\text{TpOMePC}]\text{py}_2$  in  $\text{benzene-}d_6$ .

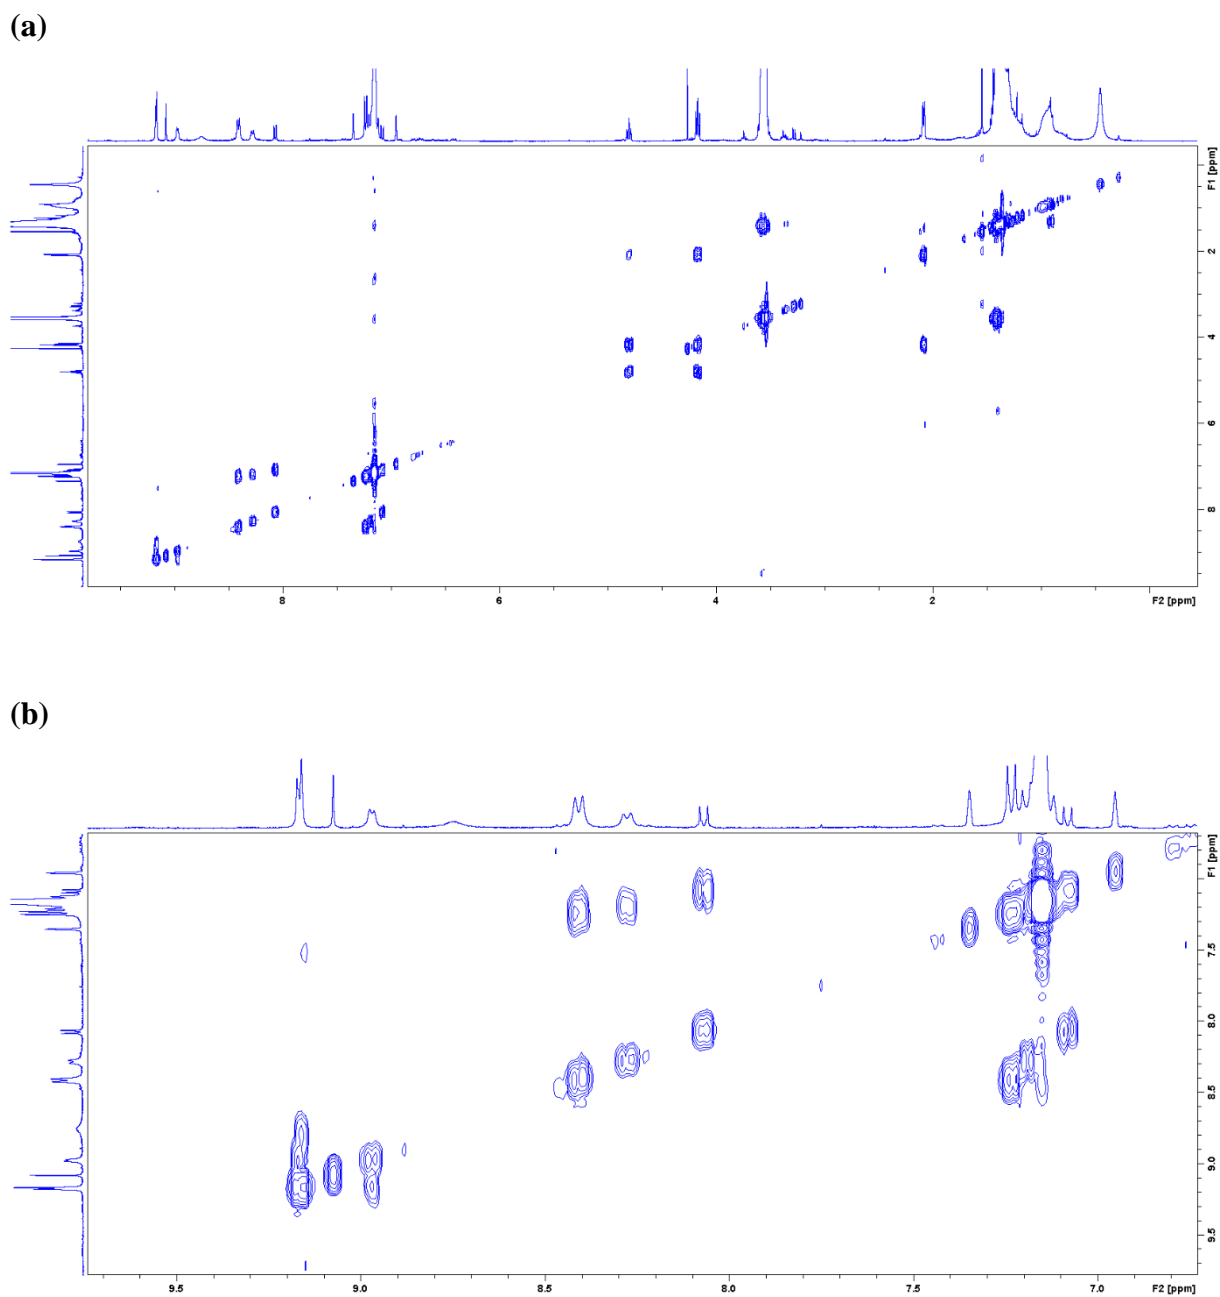

**Figure 32.** (a) COSY of Ir[TpOMePC]py<sub>2</sub> in benzene-*d*<sub>6</sub>. (b) Close-up of aromatic area.

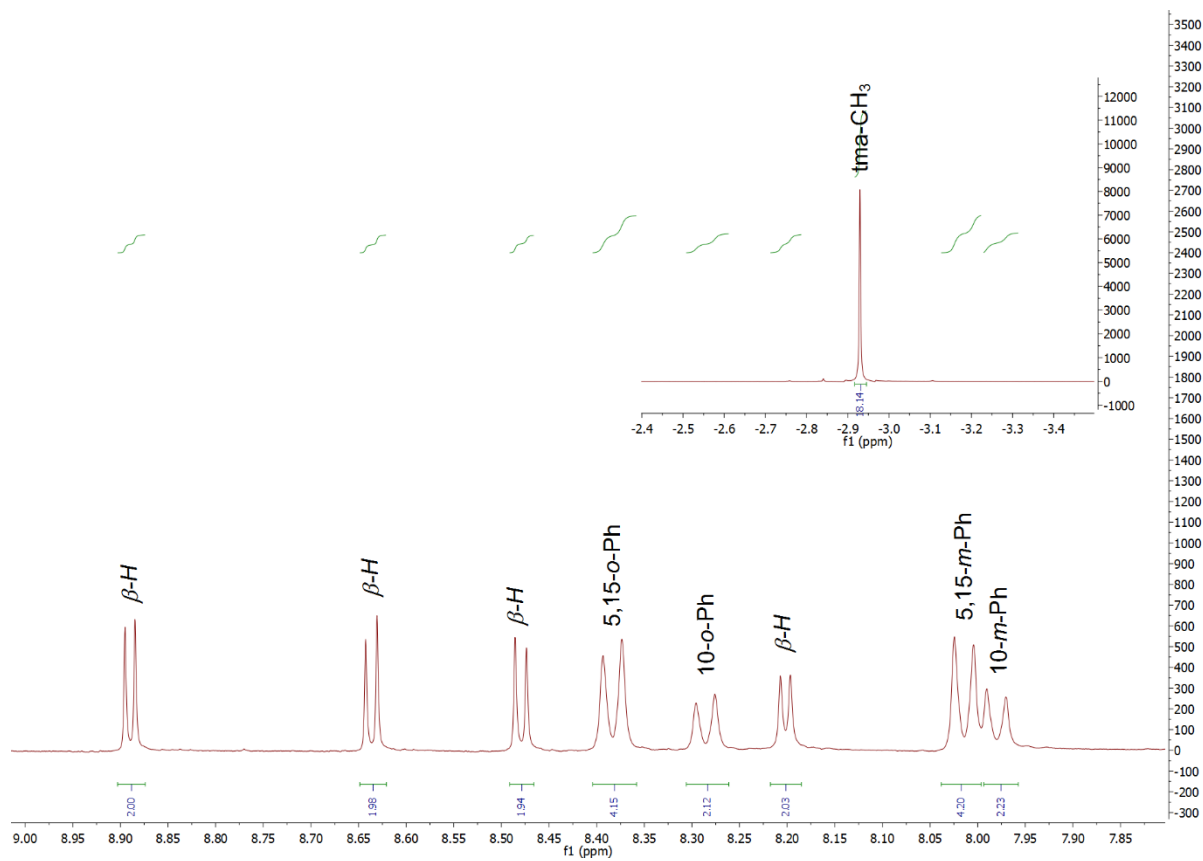

**Figure 33.**  $^1\text{H}$  NMR spectrum of  $\text{Ir}[\text{TpCF}_3\text{PC}]\text{tma}_2$  in chloroform-*d*.

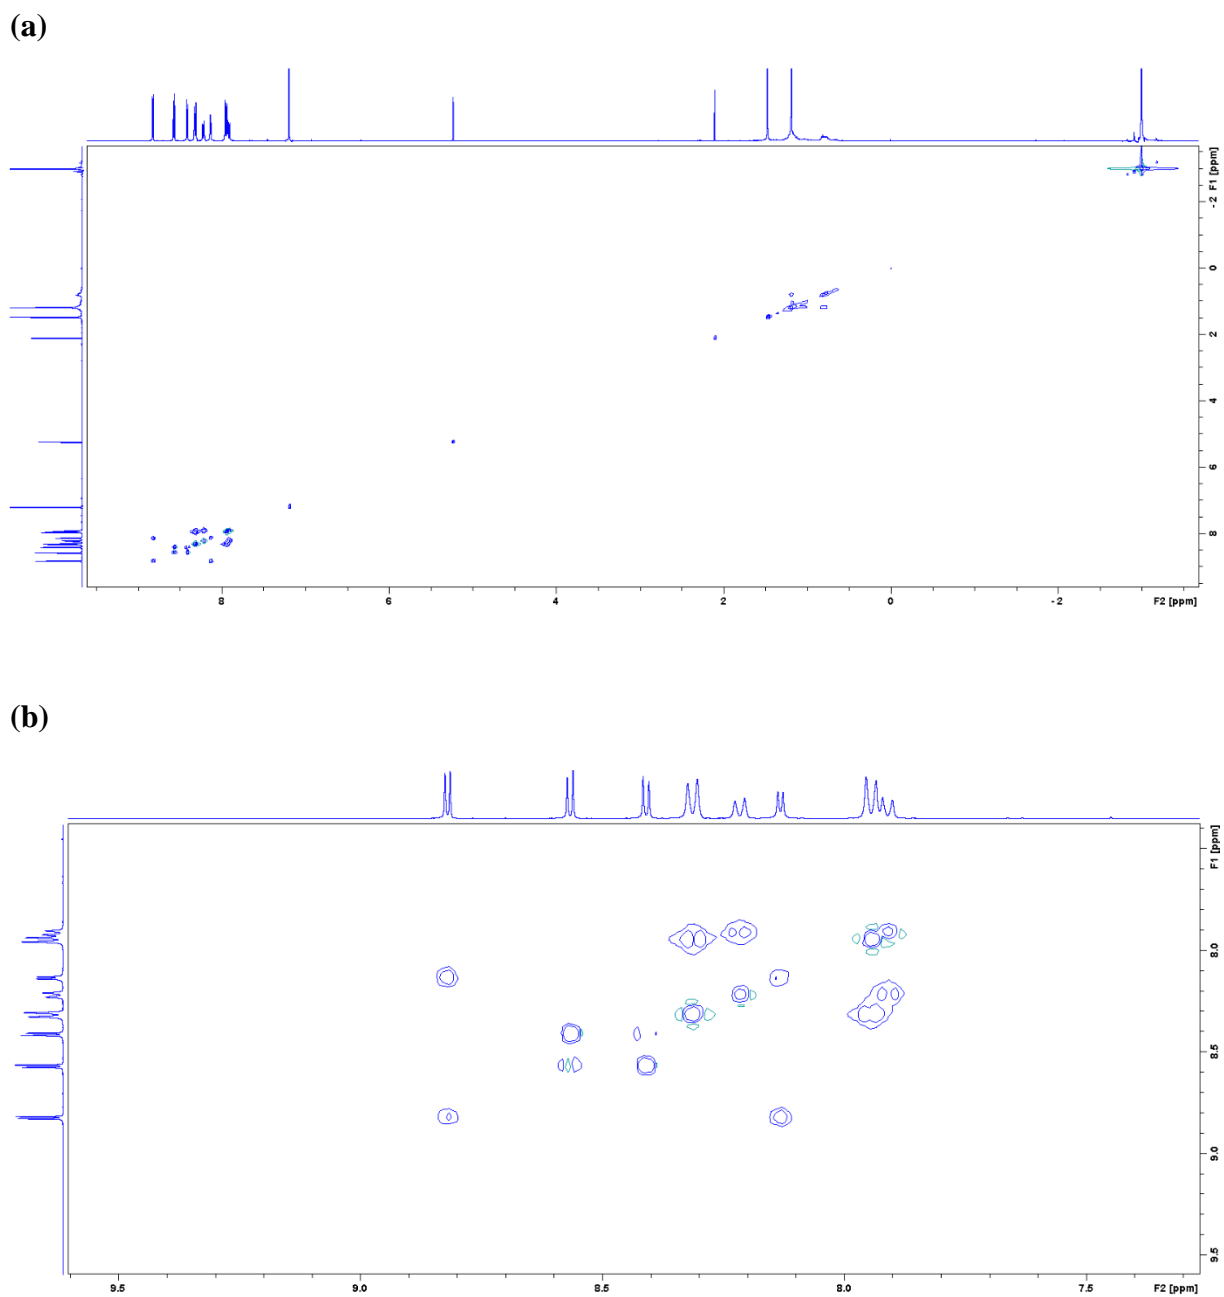

**Figure 34.** (a) COSY of Ir[TpCF<sub>3</sub>PC]tma<sub>2</sub> in chloroform-*d*. (b) Close-up of aromatic area.

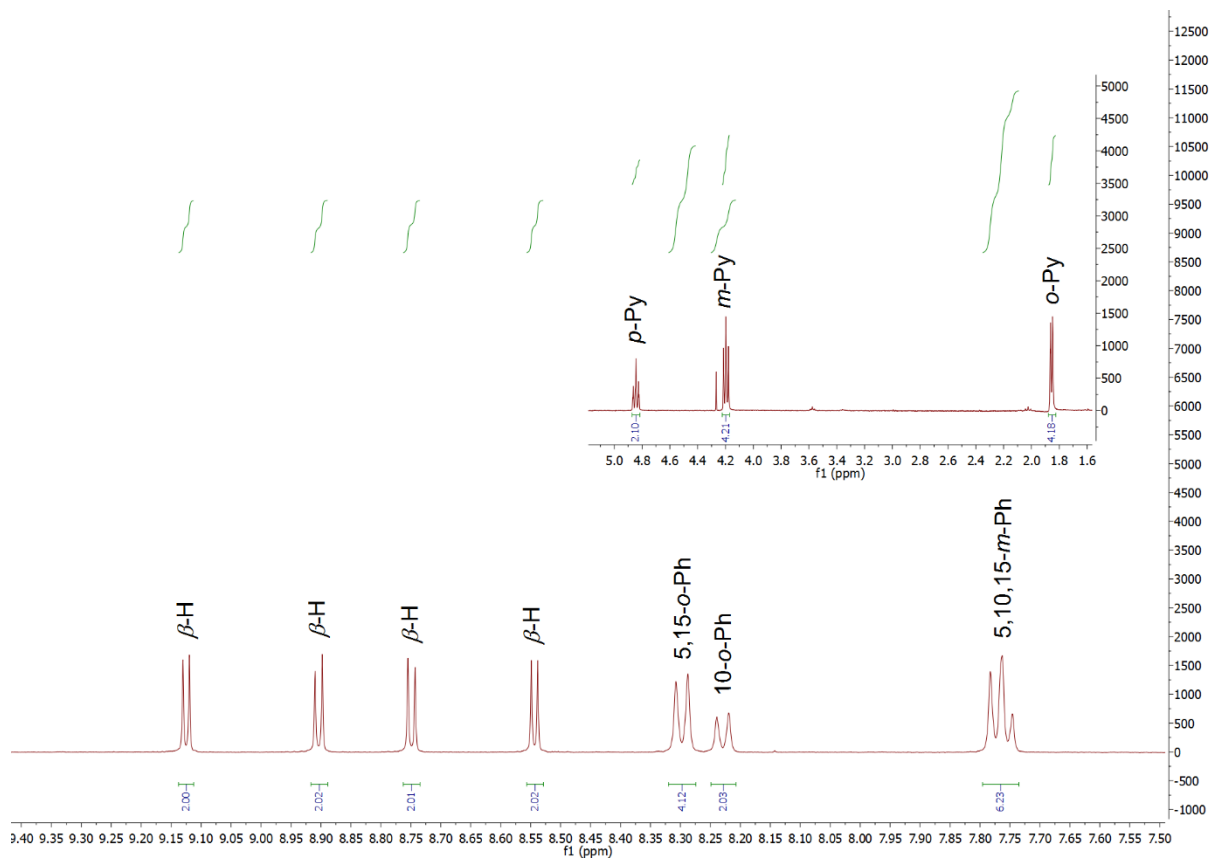

**Figure 35.**  $^1\text{H}$  NMR spectrum of  $\text{Ir}[\text{TpCF}_3\text{PC}]\text{py}_2$  in  $\text{benzene-}d_6$ .



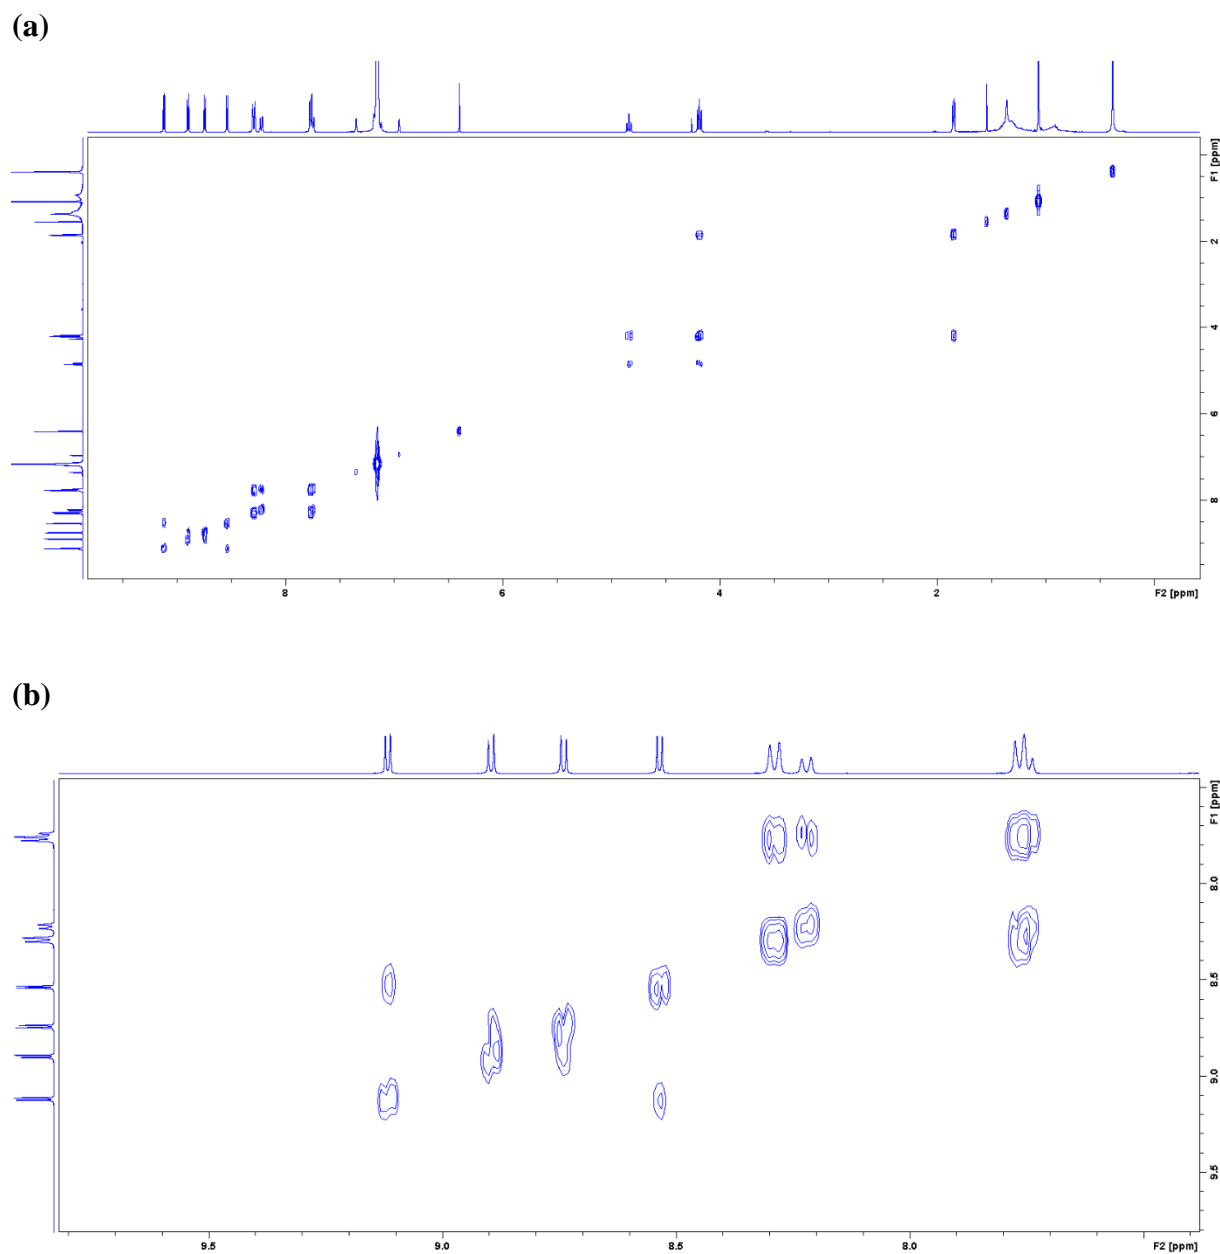

**Figure 36.** (a) COSY of Ir[TpCF<sub>3</sub>PC]py<sub>2</sub> in benzene-*d*<sub>6</sub>. (b) Close-up of aromatic area.

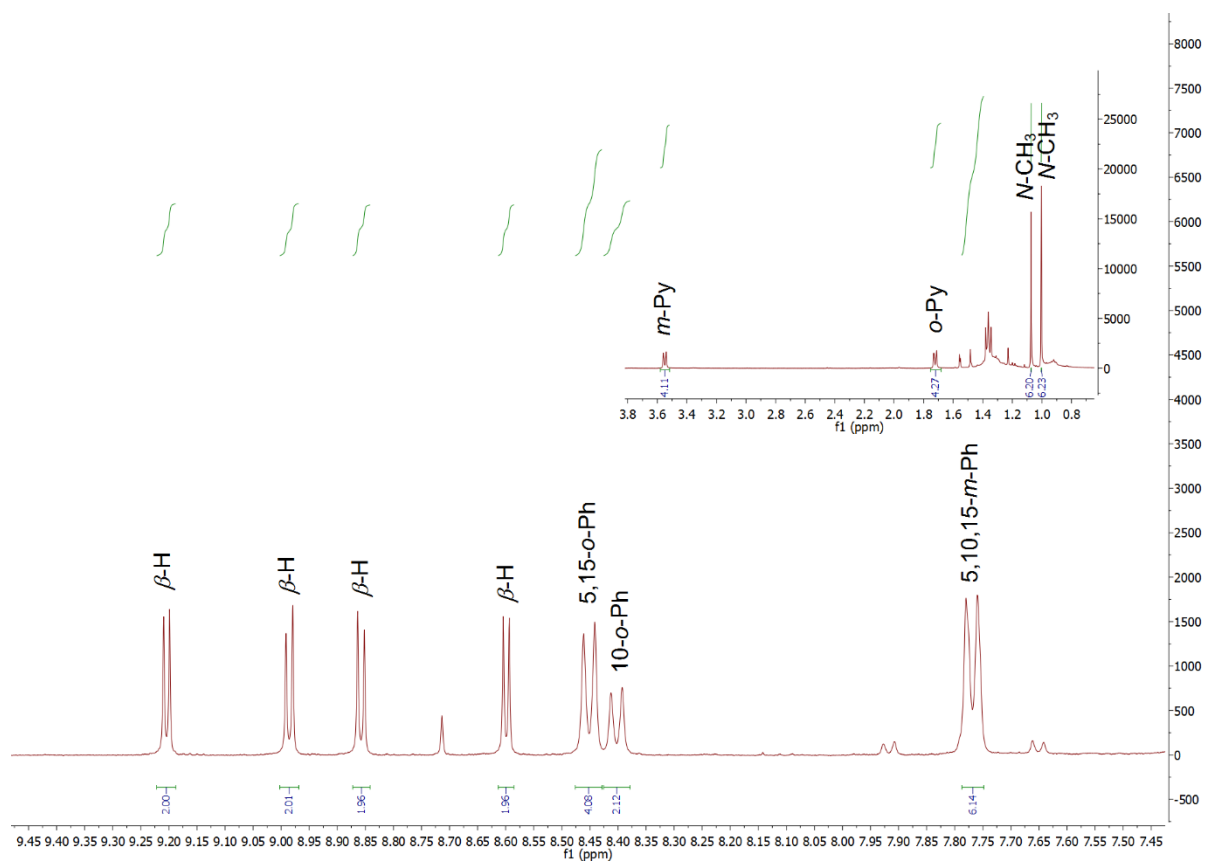

**Figure 37.** <sup>1</sup>H NMR spectrum of Ir[TpCF<sub>3</sub>PC]dmap<sub>2</sub> in benzene-*d*<sub>6</sub>.

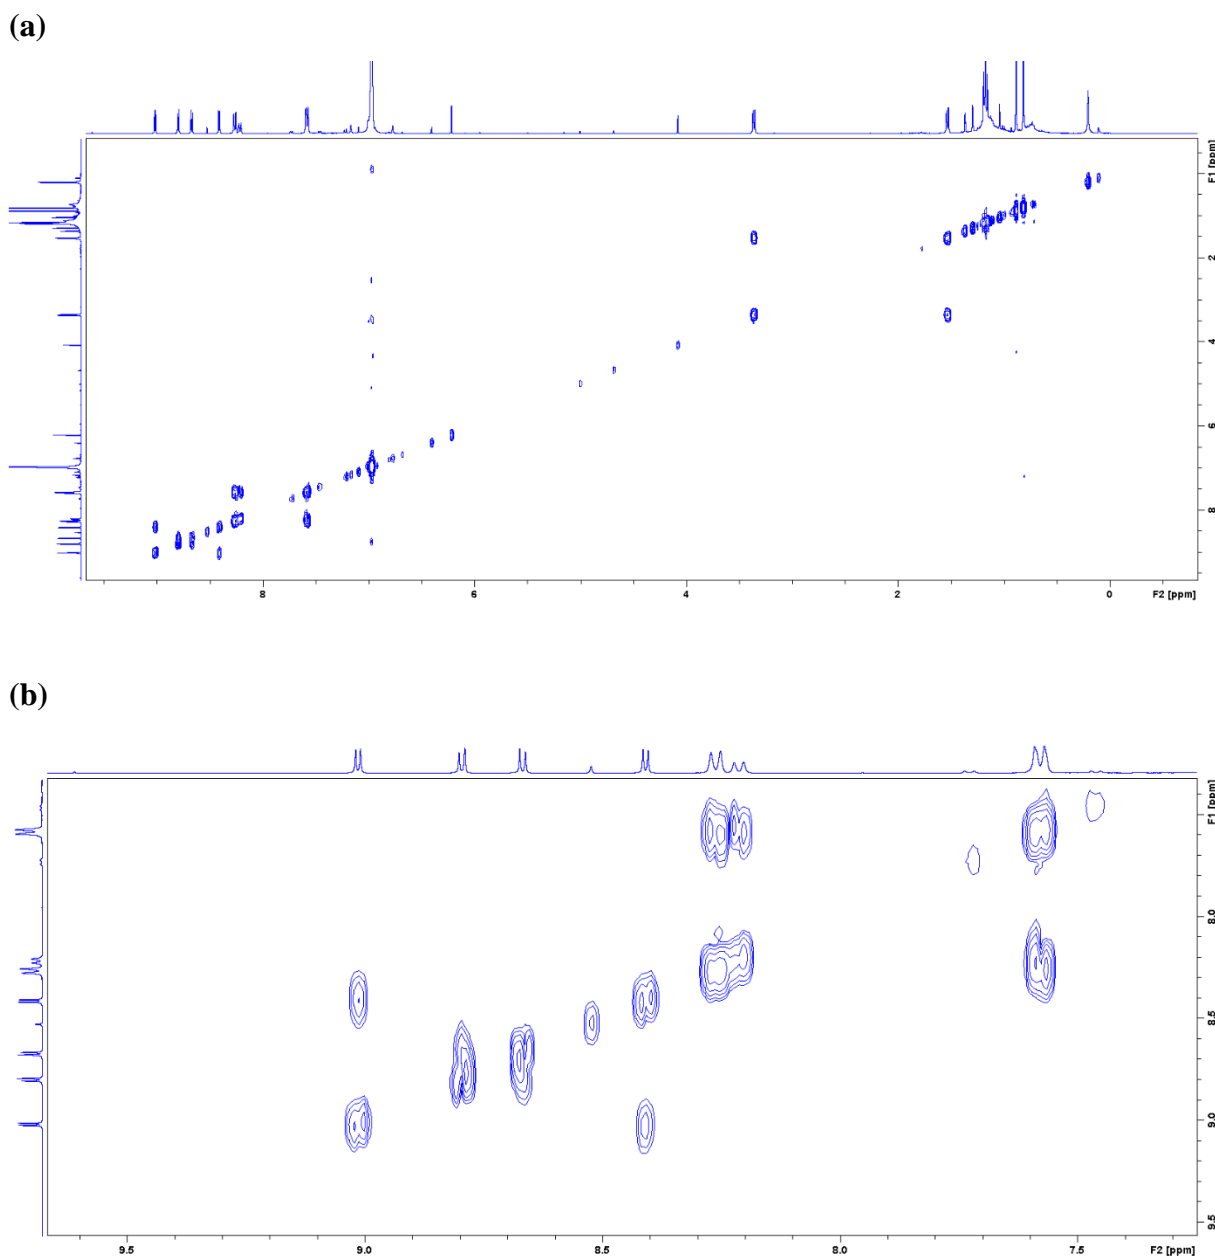

**Figure 38.** (a) COSY of Ir[TpCF<sub>3</sub>PC]dmap<sub>2</sub> in benzene-*d*<sub>6</sub>. (b) Close-up of aromatic area.

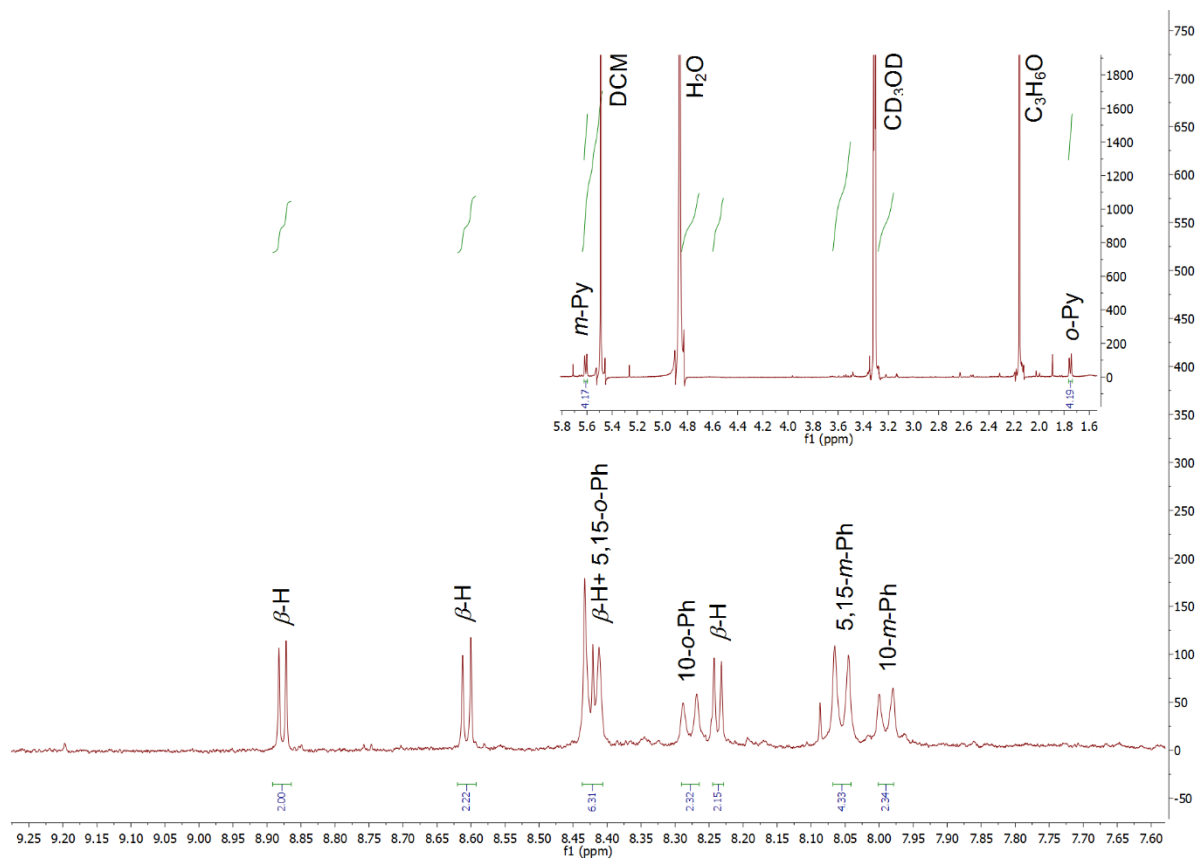

**Figure 39.** <sup>1</sup>H NMR spectrum of Ir[TpCF<sub>3</sub>PC]4pa<sub>2</sub> in methanol-*d*<sub>4</sub>.

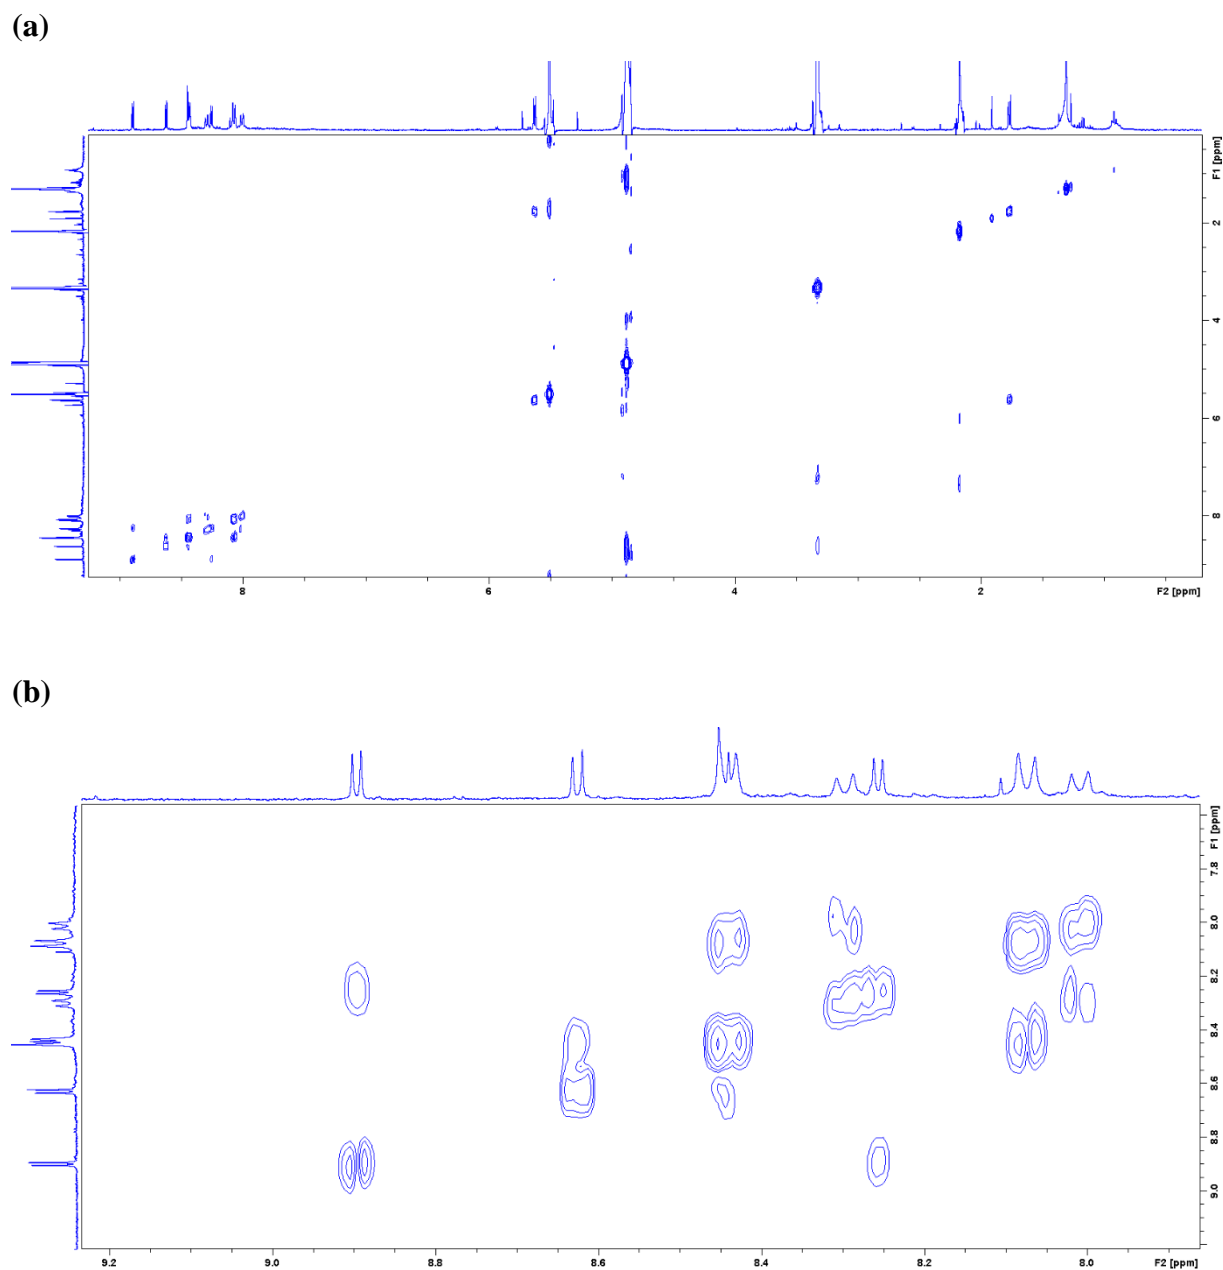

**Figure 40.** (a) COSY of Ir[TpCF<sub>3</sub>PC]4pa<sub>2</sub> in methanol-*d*<sub>4</sub>. (b) Close-up of aromatic area.

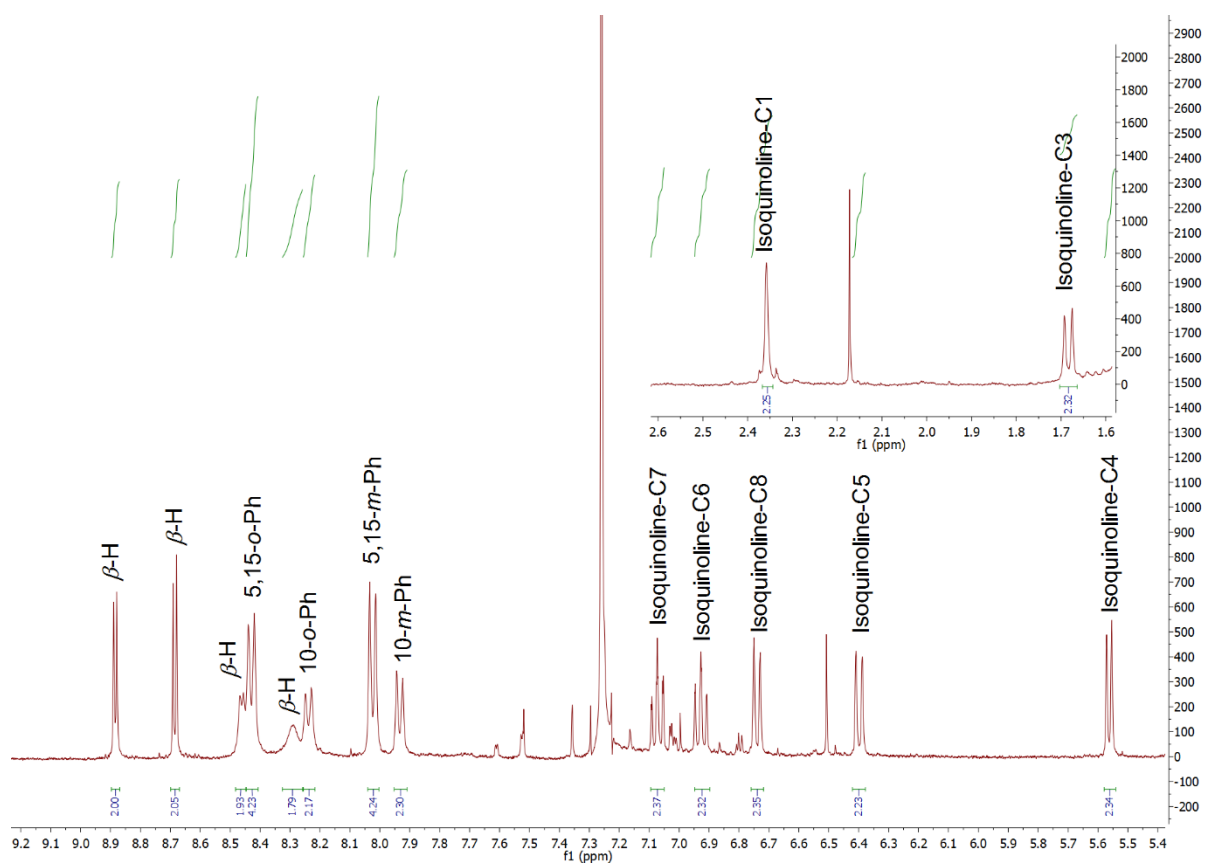

**Figure 41.**  $^1\text{H}$  NMR spectrum of  $\text{Ir}[\text{TpCF}_3\text{PC}]\text{isoq}_2$  in chloroform-*d*.

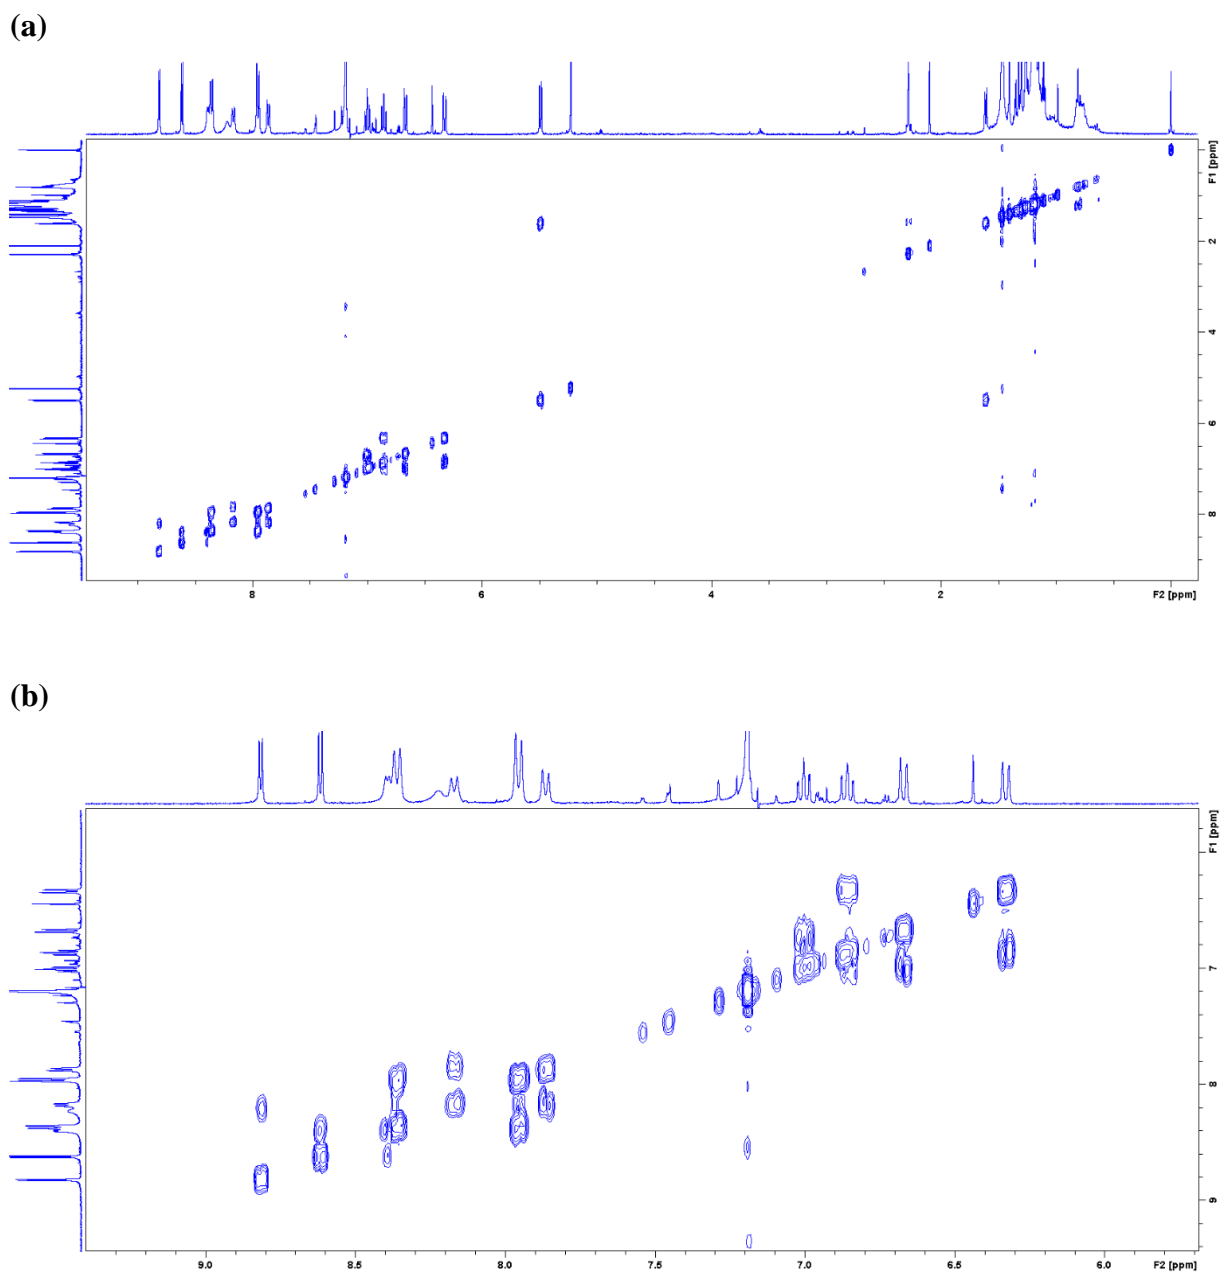

**Figure 42.** (a) COSY of Ir[TpCF<sub>3</sub>PC]isoq<sub>2</sub> in chloroform-*d*. (b) Close-up of aromatic area.
